# Supplementary material for: Time scales for pluton growth, magma chamber formation and super-eruptions
Source: Research Square preprint supplement (doi:10.21203/rs.3.rs-447477/v1), 2021-05-25
Supplement: Supplementary file 1 [file 1d896ca499ae71c7e2903253.pdf]

## Supplementary Materials.

This document contains the two figures (S1 and S2) and Table M1 referred to in the Methods section.

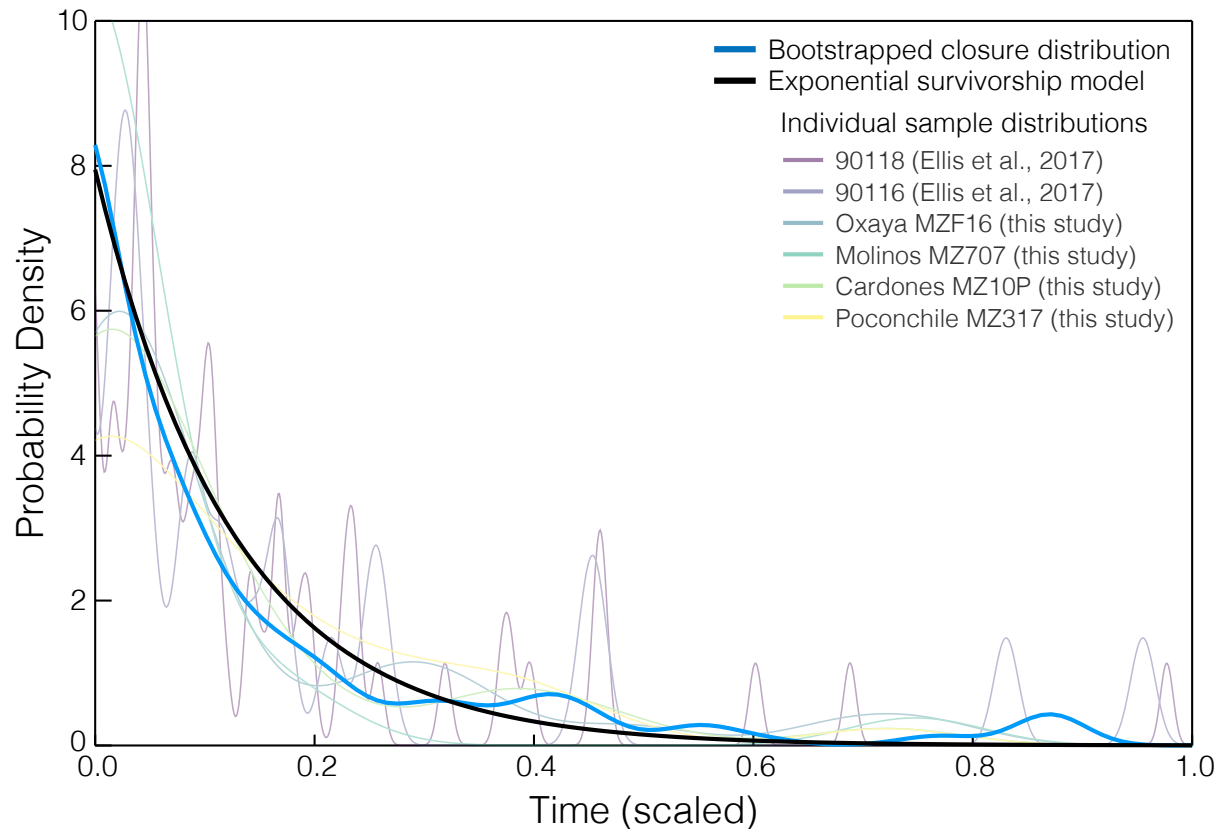

Figure S1: The form of the relative closure distribution, scaled from time of first closure (1.0) to time of eruption (0.0). The empirical (“bootstrapped”) estimate of the form of this closure distribution (thick blue line) decreases as a function of time before eruption, following a trend closely resembling that of a similarly scaled exponential distribution (thick black line). This bootstrapped closure distribution is calculated as the kernel density estimate of the union of the sets of scaled single-grain closure ages for each individual sample, the probability density functions of which are each shown as thin colored lines in the background. Both the highly-dispersed single-grain volcanic sanidine Ar-Ar age distributions of the four Central Andean ignimbrites (this study) as well as the similarly dispersed single-grain volcanic sanidine Ar-Ar age distributions of the Mesa Falls Tuff (Ellis et al., 2017)<sup>67</sup> are consistent with an exponential relative closure distribution of this form.

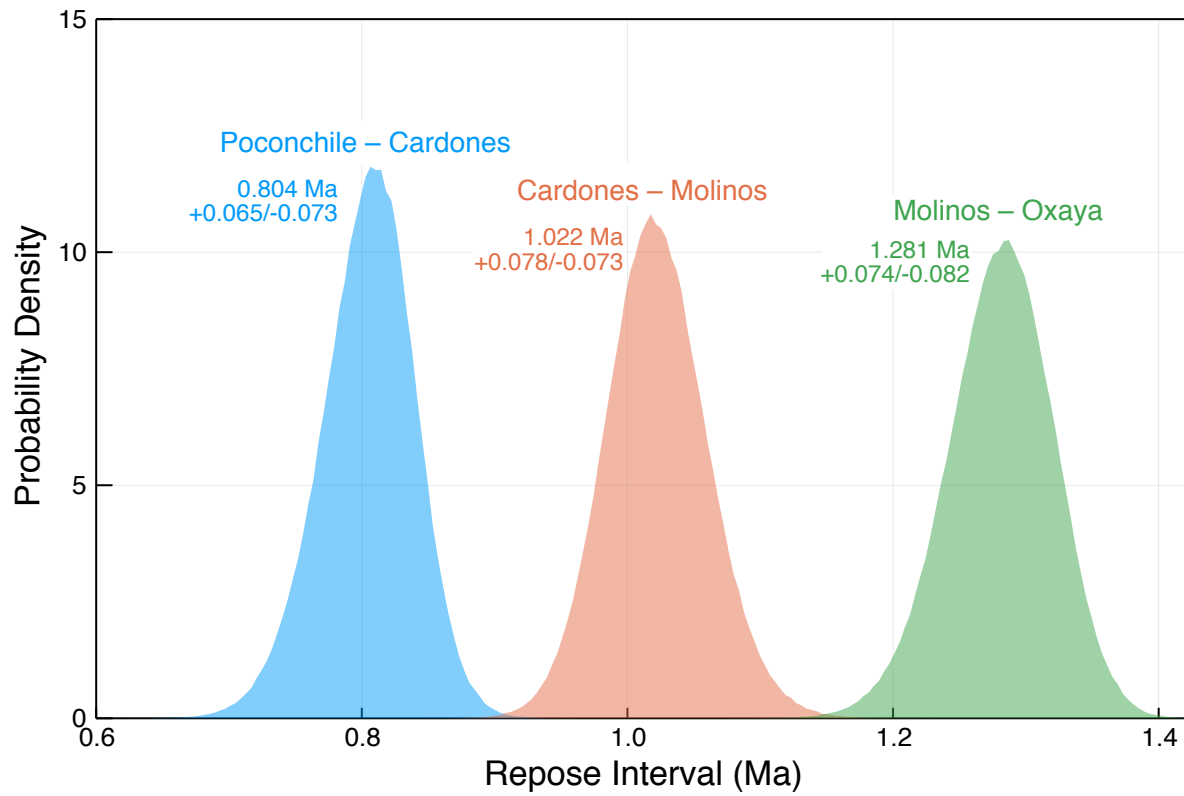

Figure S2: Repose interval durations. The posterior distributions for the durations of the repose intervals of each sequential pair of eruptions (Poconchile to Cardones, Cardones to Molinos, and Molinos to Oxaya), as illustrated for each pair by a normalized histogram of the stationary distribution of a Markov chain Monte Carlo model that integrates the constraints provided by (1) the posterior eruption age distributions for each ignimbrite derived from the Bayesian eruption age models as well as (2) the relative age constraints provided by the stratigraphic superposition of the ignimbrite deposits. While the absolute time uncertainties of the absolute eruption ages shown in Figure 2 are substantially increased by systematic (tracer/standard and decay constant) uncertainties, such systematic uncertainties effectively cancel when calculating the relative durations shown here.

| Ignimbrite<br>Sample<br>Location                                          | Description sample                                                             | ID-TIMS zircon Bayesian<br>eruption age estimate based<br>on data from van Zalinge et<br>al., 2016 (95% confidence,<br>full systematic uncertainty) | $^{40}\text{Ar}/^{39}\text{Ar}$ Bayesian<br>eruption age estimate<br>(data this study)<br>(95% confidence, full<br>systematic uncertainty) | Range older $^{40}\text{Ar}/^{39}\text{Ar}$ ages<br>(not included in weighted<br>mean eruption age estimate)<br>(data are 95% confidence,<br>analytical uncertainties) | Eruption age<br>(95% confidence, full<br>systematic uncertainty) |
|---------------------------------------------------------------------------|--------------------------------------------------------------------------------|-----------------------------------------------------------------------------------------------------------------------------------------------------|--------------------------------------------------------------------------------------------------------------------------------------------|------------------------------------------------------------------------------------------------------------------------------------------------------------------------|------------------------------------------------------------------|
| Poconchile<br>Drill hole 2<br>18°14'15.36"<br>69°48'39.36"<br>897 m depth | Bulk rock; lithics carefully<br>removed                                        | 22.712<br>+0.033/-0.05 Ma                                                                                                                           | 22.539<br>+0.084/-0.098 Ma                                                                                                                 | 23.336 ± 0.172 – 28.269 ±<br>0.238, n = 19                                                                                                                             | 22.626<br>+0.053/-0.060 Ma                                       |
| Cardones<br>Drill hole 1<br>18°11'11.22"<br>69°45'46.53"<br>244 m depth   | Large pumice clasts                                                            | 21.883 ± 0.028/-0.042<br>Ma                                                                                                                         | 21.796<br>+0.072/0.089 Ma                                                                                                                  | 22.307 ± 0.186 – 28.287 ±<br>0.213, n = 19                                                                                                                             | 21.840<br>+0.048/-0.054 Ma                                       |
| Molinos<br>Drill hole 7<br>18°17'58.75"<br>69°53'11.79"<br>153 m depth    | Multiple small pumice<br>lapilli carefully<br>separated from the bulk<br>rock. | No data                                                                                                                                             | 20.821<br>+0.057/-0.068 Ma                                                                                                                 | 21.353 ± 0.178 – 27.298 ±<br>0.237, n = 6                                                                                                                              | 20.821<br>+0.057/-0.068 Ma                                       |
| Oxaya<br>Molinos Field<br>section<br>18°22'00.9"<br>69°57'13.1"           | Welded fiamme-rich bulk<br>rock<br>with no lithics                             | 19.567 ± 0.067/-0.075<br>Ma                                                                                                                         | 19.538<br>+0.053/-0.062 Ma                                                                                                                 | 20.092 ± 0.146 – 21.063 ±<br>0.174, n = 8                                                                                                                              | 19.553<br>+0.049/-0.063                                          |

Table M1 Geochronological data. Locations of drill holes are shown in Figure 1B.
