# Supplementary material for: Time scales for pluton growth, magma chamber formation and super-eruptions
Source: Research Square preprint supplement (doi:10.21203/rs.3.rs-447477/v1), 2021-05-25
Supplement: Supplementary file 1 [file 21fd7a3ca3515803f8caa6e7.xlsx]

## Sheet: Sheet1
Spark et al LA-ICP-MS U-Pb zircon data, British Geological Survey						Data for Tera-Wasserburg plot2					Data for Wetherill plot3						Dates3
Identifier	Comments	206Pb mV	238U mV	Pb ppm	Uppm1	238U/206Pb	1s %	207Pb/206Pb	1s %	207Pb/235U	1s %	206Pb/238U	1s %	Rho	207Pb/206Pb	2s abs	206Pb/238U	2s abs	207Pb/235U	2s abs	% conc4
MXZ5_A_4	F16 - Oxaya ignimbrite - pumice-rich rock	0.786759	314.214	1.53257	492.938	326.906	0.751883	0.046939	0.556624	0.0197887	0.935499	0.00305899	0.751883	0.803724	46.124	13.3005	19.6894	0.295624	19.8969	0.36858	98.9572
MXZ5_A_5a	F16 - Oxaya ignimbrite - pumice-rich rock	2.45625	961.289	4.78466	1508.07	323.771	0.712297	0.0471739	0.369425	0.0200803	0.802397	0.0030886	0.712297	0.887711	58.0389	8.80765	19.8797	0.282763	20.1871	0.320712	98.4771
MXZ5_A_6a	F16 - Oxaya ignimbrite - pumice-rich rock	1.48939	45.0752	2.90126	70.7138	24.7796	0.792949	0.0511596	0.398521	0.284537	0.887461	0.0403557	0.792949	0.893503	248.029	9.1742	255.037	3.96445	254.25	3.98427	100.31
MXZ5_A_6b	F16 - Oxaya ignimbrite - pumice-rich rock	1.00923	31.389	1.96593	49.243	25.3559	1.16637	0.0511019	0.466127	0.277756	1.25606	0.0394385	1.16637	0.928592	245.43	10.7356	249.352	5.70315	248.876	5.52974	100.191
MXZ5_A_7	F16 - Oxaya ignimbrite - pumice-rich rock	1.48892	586.704	2.90034	920.419	324.364	0.648728	0.046885	0.337503	0.0199208	0.73127	0.00308295	0.648728	0.887125	43.3749	8.06879	19.8434	0.257059	20.0284	0.290012	99.0763
MXZ5_A_9a	F16 - Oxaya ignimbrite - pumice-rich rock	0.134177	52.5563	0.26137	82.4501	321.372	0.707019	0.0483146	1.30198	0.0207194	1.48156	0.00311166	0.707019	0.477212	114.703	30.7141	20.0279	0.282756	20.8231	0.610546	96.1811
MXZ5_A_10	F16 - Oxaya ignimbrite - pumice-rich rock	0.147075	57.3981	0.286495	90.0459	323.472	0.711638	0.0483223	1.28138	0.0205882	1.46573	0.00309146	0.711638	0.485517	115.079	30.2262	19.8981	0.282762	20.6926	0.600279	96.1606
MXZ5_A_11	F16 - Oxaya ignimbrite - pumice-rich rock	0.150238	58.8421	0.292656	92.3113	320.632	0.801581	0.0480095	1.00339	0.020636	1.28426	0.00311884	0.801581	0.624159	99.7393	23.7363	20.074	0.321311	20.7402	0.527175	96.788
MXZ5_A_12	F16 - Oxaya ignimbrite - pumice-rich rock	0.0960608	37.7487	0.187122	59.22	321.014	1.05935	0.048472	1.31821	0.02081	1.69112	0.00311513	1.05935	0.626418	122.371	31.0527	20.0502	0.424128	20.9133	0.699862	95.8729
MXZ5_A_14	F16 - Oxaya ignimbrite - pumice-rich rock	0.126683	49.7947	0.246772	78.1178	320.476	0.608905	0.0480546	1.34987	0.0206655	1.48085	0.00312036	0.608905	0.411187	101.958	31.9195	20.0838	0.244197	20.7695	0.608697	96.6985
MXZ5_A_16	F16 - Oxaya ignimbrite - pumice-rich rock	0.214531	86.3135	0.417896	135.408	328.905	0.953824	0.0478365	0.986454	0.0200445	1.37218	0.00304039	0.953824	0.695117	91.1907	23.373	19.5699	0.372748	20.1515	0.547431	97.1136
MXZ5_A_18	F16 - Oxaya ignimbrite - pumice-rich rock	0.144318	57.1183	0.281124	89.607	322.101	0.676413	0.0476873	1.29795	0.020404	1.46363	0.00310461	0.676413	0.462148	83.7829	30.7961	19.9826	0.269906	20.5094	0.594165	97.4316
MXZ5_A_19	F16 - Oxaya ignimbrite - pumice-rich rock	0.155049	60.8318	0.302028	95.4327	324.005	0.583209	0.0479755	1.14687	0.0204068	1.28664	0.00308637	0.583209	0.45328	98.0633	27.1391	19.8654	0.231353	20.5121	0.522405	96.8472
F16_5	Oxaya ignimbrite - upper member (pumice-rich rock)	0.438484	165.163	0.917509	277.888	309.205	1.46413	0.0487228	0.63015	0.0217166	1.59397	0.0032341	1.46413	0.918538	133.454	14.8139	20.8147	0.608496	21.8146	0.687789	95.4163
F16_10	Oxaya ignimbrite - upper member (pumice-rich rock)	1.1211	437.473	2.34585	736.051	322.627	1.49533	0.0472708	0.436683	0.0201929	1.55779	0.00309956	1.49533	0.959906	61.8578	10.4037	19.9501	0.595692	20.2993	0.625967	98.2801
F16_14	Oxaya ignimbrite - upper member (pumice-rich rock)	0.0851944	32.9426	0.178266	55.4261	312.55	1.29042	0.0477734	1.29126	0.0210656	1.82552	0.00319949	1.29042	0.706876	86.9977	30.619	20.5923	0.530584	21.1674	0.764546	97.2829
F16_16	Oxaya ignimbrite - upper member (pumice-rich rock)	0.0805759	31.7452	0.168602	53.4115	323.874	1.43058	0.0478979	1.84097	0.020382	2.33146	0.00308762	1.43058	0.613596	93.1637	43.6038	19.8734	0.567708	20.4874	0.945301	97.003
F16_19	Oxaya ignimbrite - upper member (pumice-rich rock)	0.899146	352.192	1.88142	592.565	314.925	1.24092	0.0473418	0.663178	0.0207178	1.40701	0.00317536	1.24092	0.881953	65.4348	15.7892	20.4373	0.506396	20.8216	0.579791	98.1542
F16_21	Oxaya ignimbrite - upper member (pumice-rich rock)	0.088234	34.8057	0.184626	58.5608	321.966	1.4051	0.0482893	1.27822	0.0206703	1.89951	0.00310592	1.4051	0.739716	112.405	30.1665	19.991	0.560891	20.7743	0.7809	96.2295
F16_25	Oxaya ignimbrite - upper member (pumice-rich rock)	0.123524	48.757	0.258469	82.0339	322.636	1.49535	0.0470254	1.0639	0.0200875	1.8352	0.00309947	1.49535	0.814817	49.4434	25.4059	19.9496	0.595684	20.1944	0.733627	98.7878
F16_28	Oxaya ignimbrite - upper member (pumice-rich rock)	0.325655	129.136	0.681419	217.272	326.832	1.35078	0.0474295	0.915019	0.02	1.63152	0.00305967	1.35078	0.827925	69.8349	21.7672	19.6938	0.531205	20.1072	0.649445	97.944
F16_35	Oxaya ignimbrite - upper member (pumice-rich rock)	0.662476	254.222	1.3862	427.73	316.434	1.64456	0.0476616	0.793259	0.0207583	1.82588	0.00316022	1.64456	0.900695	81.4382	18.8297	20.3399	0.667917	20.8618	0.753772	97.4984
F16_36	Oxaya ignimbrite - upper member (pumice-rich rock)	0.0964121	37.8286	0.201738	63.6468	323.479	1.40802	0.046676	1.38267	0.0198863	1.97339	0.00309139	1.40802	0.7135	31.6059	33.1294	19.8977	0.559436	19.9941	0.781104	99.5178
F16_37	Oxaya ignimbrite - upper member (pumice-rich rock)	0.111856	43.7298	0.234054	73.5756	319.376	1.42145	0.0486966	1.24817	0.0210137	1.89168	0.00313111	1.42145	0.751421	132.191	29.3495	20.1529	0.572005	21.1159	0.790331	95.4395
F16_39	Oxaya ignimbrite - upper member (pumice-rich rock)	0.268298	104.811	0.561402	176.345	319.151	1.46476	0.0484706	1.33393	0.0209309	1.98113	0.00313332	1.46476	0.739354	121.242	31.4297	20.1671	0.589848	21.0335	0.824497	95.8805
F16_43	Oxaya ignimbrite - upper member (pumice-rich rock)	0.0614526	24.2278	0.128587	40.7634	318.445	1.44119	0.0467202	1.54901	0.0202198	2.11577	0.00314026	1.44119	0.681166	33.8732	37.0992	20.2117	0.581639	20.326	0.851193	99.4376
F16_45	Oxaya ignimbrite - upper member (pumice-rich rock)	0.0900487	34.6612	0.188423	58.3177	317.609	1.29751	0.0479546	1.49022	0.0208086	1.97593	0.00314852	1.29751	0.65666	95.9671	35.2777	20.2648	0.52503	20.9119	0.817629	96.9056
F16_47	Oxaya ignimbrite - upper member (pumice-rich rock)	0.151201	59.9561	0.316382	100.876	323.526	1.69174	0.0479027	1.77903	0.0204059	2.45498	0.00309094	1.69174	0.689105	93.4011	42.1348	19.8948	0.672063	20.5113	0.996504	96.9942
F16_52	Oxaya ignimbrite - upper member (pumice-rich rock)	0.131207	52.1184	0.274545	87.6895	326.062	1.21914	0.0479912	1.16451	0.0202846	1.68594	0.0030669	1.21914	0.723122	97.7706	27.558	19.7402	0.480568	20.3905	0.680459	96.8108
F16_54	Oxaya ignimbrite - upper member (pumice-rich rock)	0.130677	50.9611	0.273436	85.7423	321.497	1.36235	0.0473861	1.34235	0.0203133	1.91257	0.00311044	1.36235	0.712316	67.6609	31.9459	20.0201	0.544619	20.4191	0.77296	98.0461
F16_63	Oxaya ignimbrite - upper member (pumice-rich rock)	0.0622194	24.4359	0.130191	41.1135	322.236	1.26691	0.0478253	1.72003	0.0204545	2.13625	0.00310332	1.26691	0.593054	89.5688	40.7666	19.9743	0.50531	20.5596	0.869205	97.153
F16_66	Oxaya ignimbrite - upper member (pumice-rich rock)	0.0909253	35.5152	0.190257	59.7545	321.121	1.18343	0.048057	1.83504	0.020625	2.18355	0.00311409	1.18343	0.541977	101.015	43.3996	20.0435	0.47365	20.7293	0.895693	96.692
F16_67	Oxaya ignimbrite - upper member (pumice-rich rock)	0.09024	36.1396	0.188823	60.8051	325.309	1.27071	0.0451857	1.62142	0.019143	2.06003	0.003074	1.27071	0.616841	-46.7281	39.4334	19.7859	0.502051	19.2538	0.785489	102.764
F16_68	Oxaya ignimbrite - upper member (pumice-rich rock)	0.0503928	20.1912	0.105445	33.9718	329.9	1.27642	0.0470513	1.74747	0.019656	2.164	0.00303122	1.27642	0.589844	50.7567	41.7194	19.511	0.497313	19.7648	0.846795	98.7159
F16_72	Oxaya ignimbrite - upper member (pumice-rich rock)	1.20451	482.084	2.52039	811.109	330.063	1.20643	0.0478696	0.566439	0.019988	1.33279	0.00302972	1.20643	0.905192	91.7626	13.4197	19.5013	0.469811	20.0953	0.53025	97.0444
F16_75	Oxaya ignimbrite - upper member (pumice-rich rock)	0.266636	106.589	0.557924	179.337	323.896	1.30643	0.04702	1.16642	0.0200071	1.75137	0.00308741	1.30643	0.745949	49.1697	27.8556	19.8721	0.518412	20.1143	0.69738	98.7959
F16_79	Oxaya ignimbrite - upper member (pumice-rich rock)	0.0680925	27.4055	0.142481	46.1099	329.788	1.39828	0.0481644	2.30347	0.0201278	2.69465	0.00303225	1.39828	0.518909	106.287	54.4247	19.5176	0.544971	20.2345	1.07913	96.4569
707_3	Molinos ignimbrite (bulkrock, but lithics separated out)	0.46346	161.619	1.16746	327.427	281.224	1.2795	0.0471074	0.501627	0.0230857	1.37432	0.00355589	1.2795	0.931007	54.675	11.9671	22.8821	0.584489	23.1744	0.62957	98.7388
707_6	Molinos ignimbrite (bulkrock, but lithics separated out)	0.400435	138.496	1.0087	280.581	281.761	1.40251	0.0481295	0.560861	0.0235416	1.5105	0.00354911	1.40251	0.92851	105.639	13.2533	22.8385	0.639462	23.6268	0.70528	96.6638
707_7	Molinos ignimbrite (bulkrock, but lithics separated out)	2.17532	741.2	5.47966	1501.61	281.043	1.27923	0.0475354	0.483242	0.0233105	1.36747	0.00355818	1.27923	0.935478	76.2105	11.482	22.8968	0.584741	23.3974	0.63239	97.8603
707_9	Molinos ignimbrite (bulkrock, but lithics separated out)	0.513352	179.714	1.29314	364.086	277.72	1.2011	0.0475308	0.76659	0.023587	1.42488	0.00360075	1.2011	0.842944	75.9768	18.2152	23.1702	0.555571	23.6718	0.66657	97.8812
707_12	Molinos ignimbrite (bulkrock, but lithics separated out)	0.184032	62.4194	0.463579	126.457	284.421	1.44688	0.0466185	1.10018	0.0225893	1.81766	0.00351592	1.44688	0.796015	29.7271	26.3703	22.6253	0.653542	22.6816	0.815077	99.752
707_18	Molinos ignimbrite (bulkrock, but lithics separated out)	0.366883	128.727	0.924183	260.79	286.027	1.59551	0.0466851	0.79751	0.0224946	1.78373	0.00349617	1.59551	0.894482	33.1503	19.1031	22.4985	0.71664	22.5875	0.796588	99.6059
707_19	Molinos ignimbrite (bulkrock, but lithics separated out)	0.449036	151.269	1.13113	306.458	274.198	1.33385	0.047343	0.65641	0.0237957	1.48662	0.00364701	1.33385	0.897239	66.5612	15.6248	23.4673	0.62487	23.8787	0.701445	98.2772
707_20	Molinos ignimbrite (bulkrock, but lithics separated out)	0.626066	222.803	1.57707	451.38	288.025	1.35983	0.0487331	0.78831	0.0233184	1.5718	0.00347192	1.35983	0.865139	135.01	18.5266	22.3426	0.606562	23.4053	0.727094	95.4598
707_23	Molinos ignimbrite (bulkrock, but lithics separated out)	0.818164	288.249	2.06097	583.969	287.586	1.24097	0.0468483	0.588773	0.0224508	1.37356	0.00347722	1.24097	0.903472	41.4994	14.081	22.3767	0.554392	22.544	0.612303	99.2579
707_24	Molinos ignimbrite (bulkrock, but lithics separated out)	0.530301	182.919	1.33584	370.579	279.815	1.29355	0.0481916	0.949618	0.023736	1.6047	0.0035738	1.29355	0.806104	108.684	22.4269	22.9971	0.593872	23.8195	0.755284	96.5474
707_25	Molinos ignimbrite (bulkrock, but lithics separated out)	0.341969	120.41	0.861425	243.941	284.876	1.30158	0.0481595	1.00894	0.0232988	1.64684	0.0035103	1.30158	0.790353	107.113	23.8348	22.5893	0.586979	23.3858	0.761163	96.5939
707_26	Molinos ignimbrite (bulkrock, but lithics separated out)	0.556276	64.1775	1.40127	130.018	93.6165	1.3821	0.0476718	0.726972	0.0701803	1.56163	0.0106819	1.3821	0.885036	83.0133	17.2511	68.4947	1.88303	68.8706	2.07755	99.4542
707_31	Molinos ignimbrite (bulkrock, but lithics separated out)	1.12141	401.53	2.82485	813.467	293.121	1.28043	0.0476039	0.690465	0.0223821	1.45473	0.00341156	1.28043	0.880183	79.6278	16.3952	21.9549	0.561254	22.4758	0.646536	97.6823
707_33	Molinos ignimbrite (bulkrock, but lithics separated out)	0.422121	140.895	1.06333	285.442	277.797	1.16298	0.0485158	1.19914	0.0240693	1.67047	0.00359976	1.16298	0.696201	124.499	28.2369	23.1638	0.537795	24.15	0.797007	95.9165
707_34	Molinos ignimbrite (bulkrock, but lithics separated out)	0.422447	147.342	1.06415	298.503	283.874	1.19367	0.0484766	1.06176	0.0235349	1.59755	0.00352268	1.19367	0.747184	122.591	25.0107	22.6688	0.540206	23.62	0.745701	95.9727
707_35	Molinos ignimbrite (bulkrock, but lithics separated out)	0.267945	95.026	0.674957	192.515	292.89	1.14983	0.0480185	0.894167	0.0225948	1.45659	0.00341425	1.14983	0.7894	100.18	21.1508	21.9722	0.504405	22.6871	0.653375	96.8488
707_37	Molinos ignimbrite (bulkrock, but lithics separated out)	0.640548	223.711	1.61355	453.22	284.965	1.25309	0.0473202	0.533161	0.0228855	1.3618	0.0035092	1.25309	0.920173	65.4155	12.6937	22.5822	0.564936	22.9756	0.61855	98.2874
707_39	Molinos ignimbrite (bulkrock, but lithics separated out)	1.01869	350.351	2.56609	709.782	283.071	1.20659	0.0467202	0.47213	0.0227466	1.29568	0.00353269	1.20659	0.931247	34.951	11.3053	22.733	0.547601	22.8377	0.585031	99.5416
707_40	Molinos ignimbrite (bulkrock, but lithics separated out)	0.851282	299.791	2.14439	607.352	287.978	1.2117	0.04775	0.652191	0.0228518	1.37607	0.00347249	1.2117	0.880551	86.9006	15.4653	22.3463	0.540583	22.9422	0.624131	97.4028
707_41	Molinos ignimbrite (bulkrock, but lithics separated out)	0.472318	166.455	1.18978	337.224	288.035	1.25713	0.0488124	0.73171	0.0233556	1.45457	0.00347181	1.25713	0.864262	138.829	17.1843	22.3419	0.560737	23.4422	0.67393	95.3065
707_43	Molinos ignimbrite (bulkrock, but lithics separated out)	0.540542	186.431	1.36163	377.694	283.751	1.22155	0.048701	1.49366	0.0236541	1.92956	0.00352422	1.22155	0.633072	133.46	35.1137	22.6786	0.553065	23.7383	0.905063	95.536
707_45	Molinos ignimbrite (bulkrock, but lithics separated out)	7.46197	582.599	18.7968	1180.3	63.8251	1.16757	0.0496405	0.378186	0.107189	1.22729	0.0156678	1.16757	0.951339	178.195	8.81757	100.218	2.32172	103.391	2.41002	96.9314
707_47	Molinos ignimbrite (bulkrock, but lithics separated out)	4.11384	1409.09	10.3628	2854.7	279.881	1.21722	0.0469473	0.441081	0.0231177	1.29468	0.00357295	1.21722	0.940176	46.5495	10.5388	22.9917	0.558699	23.2061	0.593898	99.0761
707_48	Molinos ignimbrite (bulkrock, but lithics separated out)	0.269931	95.4674	0.67996	193.409	287.378	1.19701	0.0478031	1.07533	0.022925	1.60909	0.00347974	1.19701	0.743908	89.5364	25.4866	22.3929	0.53514	23.0148	0.732063	97.2977
707_50	Molinos ignimbrite (bulkrock, but lithics separated out)	0.30554	107.77	0.769659	218.333	289.426	1.22798	0.0474039	0.674177	0.0225726	1.40087	0.00345511	1.22798	0.876581	69.6242	16.0385	22.2347	0.545111	22.665	0.627788	98.1013
707_51	Molinos ignimbrite (bulkrock, but lithics separated out)	1.06899	382.37	2.6928	774.65	290.42	1.24446	0.0477408	0.563898	0.0226553	1.36626	0.00344328	1.24446	0.910853	86.4461	13.3728	22.1587	0.550542	22.7471	0.61447	97.4135
901_2	Cardones ignimbrite - Unit 1 (bulk rock)	0.955012	323.006	1.99832	543.459	278.947	1.16388	0.0468892	0.824298	0.0231663	1.42621	0.00358491	1.16388	0.816062	42.5115	19.71	23.0685	0.535995	23.2543	0.655562	99.2008
901_3	Cardones ignimbrite - Unit 1 (bulk rock)	0.487832	167.722	1.02077	282.193	280.745	1.2042	0.0466958	0.728508	0.022923	1.40741	0.00356195	1.2042	0.855609	32.6218	17.4521	22.921	0.551024	23.0129	0.640285	99.6008
901_4	Cardones ignimbrite - Unit 1 (bulk rock)	0.336509	118.35	0.704131	199.125	284.019	1.22185	0.0469317	0.903559	0.0227733	1.51965	0.00352089	1.22185	0.804035	44.679	21.5964	22.6573	0.552682	22.8642	0.686915	99.0949
901_5	Cardones ignimbrite - Unit 1 (bulk rock)	0.201154	70.0264	0.420906	117.82	284.6	1.1683	0.047234	1.10025	0.0228732	1.60483	0.0035137	1.1683	0.727992	60.0045	26.2219	22.6111	0.527385	22.9634	0.728513	98.4658
901_6	Cardones ignimbrite - Unit 1 (bulk rock)	1.25416	441.122	2.62428	742.19	283.894	1.18045	0.0484231	0.579354	0.0235073	1.31495	0.00352244	1.18045	0.897709	118.93	13.6564	22.6672	0.534186	23.5927	0.613127	96.0774
901_7	Cardones ignimbrite - Unit 1 (bulk rock)	2.04068	694.452	4.27004	1168.42	279.583	1.18961	0.0474842	0.435648	0.0234069	1.26687	0.00357675	1.18961	0.939014	72.5802	10.3582	23.0161	0.546603	23.4931	0.58825	97.9696
901_9	Cardones ignimbrite - Unit 1 (bulk rock)	0.477083	164.514	0.998276	276.796	281.483	1.13171	0.0472194	0.958785	0.0231193	1.48325	0.00355261	1.13171	0.762993	59.2676	22.8536	22.861	0.516505	23.2077	0.680422	98.5062
901_14	Cardones ignimbrite - Unit 1 (bulk rock)	0.293954	103.074	0.615086	173.423	285.491	1.18184	0.0467762	1.02815	0.0225807	1.56647	0.00350273	1.18184	0.754459	36.7393	24.6111	22.5406	0.531833	22.673	0.702217	99.4159
901_15	Cardones ignimbrite - Unit 1 (bulk rock)	0.835442	292.881	1.74813	492.774	282.124	1.24938	0.0468551	0.668663	0.0228888	1.41706	0.00354455	1.24938	0.881671	40.7714	15.9938	22.8092	0.568917	22.9789	0.643734	99.2614
901_17	Cardones ignimbrite - Unit 1 (bulk rock)	3.43733	1178.54	7.19247	1982.9	283.937	1.16778	0.0471266	0.437389	0.0228744	1.247	0.00352191	1.16778	0.936468	54.5762	10.4348	22.6638	0.528375	22.9646	0.566154	98.6899
901_19	Cardones ignimbrite - Unit 1 (bulk rock)	0.835298	288.783	1.74783	485.879	281.679	1.16601	0.0486088	0.934099	0.0237829	1.49403	0.00355013	1.16601	0.780446	127.945	21.9817	22.8451	0.531786	23.8661	0.704571	95.722
901_20	Cardones ignimbrite - Unit 1 (bulk rock)	0.385883	129.07	0.807444	217.161	275.11	1.22592	0.0476297	0.832742	0.0238604	1.482	0.00363491	1.22592	0.827203	79.8463	19.7728	23.3896	0.572412	23.9429	0.701125	97.6893
901_22	Cardones ignimbrite - Unit 1 (bulk rock)	1.0258	355.401	2.14644	597.964	282.714	1.1324	0.0469464	0.521048	0.0228856	1.24653	0.00353715	1.1324	0.908447	45.4274	12.4521	22.7617	0.514578	22.9757	0.566206	99.0685
901_24	Cardones ignimbrite - Unit 1 (bulk rock)	0.486283	171.031	1.01753	287.761	287.138	1.11438	0.0475877	0.679242	0.0228407	1.30507	0.00348264	1.11438	0.853884	77.754	16.1344	22.4116	0.498612	22.9312	0.591655	97.734
901_26	Cardones ignimbrite - Unit 1 (bulk rock)	0.581582	201.074	1.21694	338.308	282.362	1.16654	0.0484904	0.687578	0.0236677	1.3541	0.00354155	1.16654	0.861489	122.204	16.1977	22.79	0.530749	23.7518	0.635581	95.9507
901_27	Cardones ignimbrite - Unit 1 (bulk rock)	0.603789	210.826	1.2634	354.716	286.577	1.13459	0.0480448	0.924228	0.0231053	1.46338	0.00348946	1.13459	0.775318	100.412	21.861	22.4554	0.508644	23.1938	0.67091	96.8164
901_29	Cardones ignimbrite - Unit 1 (bulk rock)	0.505613	175.441	1.05797	295.18	282.846	1.33241	0.048191	0.581397	0.0234813	1.45373	0.00353549	1.33241	0.916544	107.594	13.7335	22.751	0.605177	23.5669	0.677082	96.5382
MXZ5_B_2	130061 - Cardones ignimbrite - bulk rock	1.7452	624.623	3.39956	979.906	292.158	0.671964	0.0472369	0.369107	0.0222828	0.766665	0.0034228	0.671964	0.876476	61.2223	8.7948	22.0271	0.295517	22.3772	0.339306	98.4357
MXZ5_B_3	130061 - Cardones ignimbrite - bulk rock	1.55261	548.105	3.02441	859.865	291.934	0.788222	0.0467643	0.443345	0.0220768	0.90435	0.00342543	0.788222	0.871589	37.2055	10.6116	22.044	0.346909	22.1725	0.39661	99.4205
MXZ5_B_4	130061 - Cardones ignimbrite - bulk rock	0.906924	323.606	1.76664	507.672	281.813	0.9018	0.0469674	0.695731	0.022969	1.13898	0.00354846	0.9018	0.791758	47.5722	16.6199	22.8343	0.411099	23.0585	0.519214	99.0277
MXZ5_B_5	130061 - Cardones ignimbrite - bulk rock	1.15027	406.431	2.24067	637.608	292.693	0.81954	0.0471177	0.404613	0.0221859	0.913979	0.00341655	0.81954	0.896673	55.1945	9.65173	21.987	0.35976	22.281	0.40277	98.6805
MXZ5_B_6	130061 - Cardones ignimbrite - bulk rock	0.42195	152.714	0.821938	239.577	292.919	0.790882	0.0470508	0.837066	0.0221373	1.1516	0.00341391	0.790882	0.68677	51.8039	19.9803	21.97	0.346913	22.2326	0.506369	98.8186
MXZ5_B_7	130061 - Cardones ignimbrite - bulk rock	0.267204	94.4768	0.5205	148.215	295.984	0.799156	0.0475018	0.809391	0.0221181	1.13744	0.00337856	0.799156	0.702594	74.5277	19.2375	21.7429	0.346925	22.2136	0.499721	97.8811
MXZ5_B_8	130061 - Cardones ignimbrite - bulk rock	0.293139	60.3618	0.57102	94.6954	169.181	0.541378	0.0472367	0.553664	0.03848	0.774361	0.00591084	0.541378	0.699129	61.2123	13.1923	37.9916	0.410133	38.339	0.582527	99.0939
MXZ5_B_9	130061 - Cardones ignimbrite - bulk rock	2.07429	725.738	4.04062	1138.54	287.774	0.517992	0.0473122	0.421316	0.0226584	0.6677	0.00347495	0.517992	0.775786	65.0164	10.0317	22.3622	0.231263	22.7501	0.300383	98.2946
MXZ5_B_11	130061 - Cardones ignimbrite - bulk rock	0.366035	132.923	0.713018	208.529	294.125	0.823549	0.0470838	0.574741	0.022062	1.00427	0.00339992	0.823549	0.820047	53.4776	13.7144	21.8801	0.359766	22.1579	0.440134	98.7464
MXZ5_B_12	130061 - Cardones ignimbrite - bulk rock	0.555517	192.38	1.08212	301.805	290.468	0.842357	0.0473016	0.69131	0.0224431	1.08971	0.00344272	0.842357	0.773008	64.4791	16.4619	22.1551	0.372598	22.5364	0.485638	98.308
MXZ5_B_13	130061 - Cardones ignimbrite - bulk rock	0.814044	283.469	1.58572	444.705	292.804	0.732011	0.0473032	0.439544	0.0222648	0.853838	0.00341525	0.732011	0.857319	64.5587	10.4666	21.9786	0.321216	22.3593	0.37758	98.2974
MXZ5_B_14	130061 - Cardones ignimbrite - bulk rock	0.27244	97.6847	0.5307	153.247	293.413	0.704191	0.047841	0.684308	0.0224713	0.981917	0.00340817	0.704191	0.717159	91.4159	16.2132	21.9331	0.30837	22.5644	0.438145	97.2024
MXZ5_B_15	130061 - Cardones ignimbrite - bulk rock	0.344272	123.896	0.670625	194.368	291.557	0.728892	0.0472884	0.651525	0.0223531	0.977635	0.00342986	0.728892	0.745567	63.8173	15.5165	22.0725	0.321211	22.447	0.43399	98.3316
MXZ5_B_16	130061 - Cardones ignimbrite - bulk rock	0.756892	270.227	1.47439	423.931	292.654	0.819432	0.0475995	0.569431	0.0224158	0.997858	0.003417	0.819432	0.821191	79.4108	13.5218	21.9899	0.35976	22.5092	0.444181	97.6926
MXZ5_B_19	130061 - Cardones ignimbrite - bulk rock	0.247183	48.807	0.4815	76.5683	162.585	0.731633	0.0469411	0.94209	0.0397904	1.19282	0.00615063	0.731633	0.613364	46.2296	22.5108	39.5281	0.576605	39.6194	0.926551	99.7695
MXZ5_B_20	130061 - Cardones ignimbrite - bulk rock	1.29173	466.075	2.51623	731.177	292.007	0.817618	0.0475523	0.437819	0.0224432	0.927462	0.00342458	0.817618	0.881566	77.0525	10.4011	22.0386	0.359757	22.5365	0.413345	97.7906
MXZ5_B_21	130061 - Cardones ignimbrite - bulk rock	0.546315	194.472	1.06419	305.087	291.348	0.72837	0.0482523	0.837659	0.022825	1.11004	0.00343232	0.72837	0.656164	111.655	19.7719	22.0883	0.32121	22.9156	0.502924	96.3897
MXZ5_B_24	130061 - Cardones ignimbrite - bulk rock	4.44877	1563.95	8.66599	2453.52	287.519	1.06382	0.0474085	0.299006	0.0227246	1.10504	0.00347803	1.06382	0.962697	69.8533	7.11295	22.3819	0.475364	22.8159	0.498504	98.0981
MXZ5_B_25	130061 - Cardones ignimbrite - bulk rock	0.338978	69.8468	0.660313	109.575	169.584	0.814006	0.047413	0.650008	0.0385317	1.04169	0.00589677	0.814006	0.781429	70.0814	15.4622	37.9014	0.615199	38.3894	0.784563	98.7286
MXZ5_B_27	130061 - Cardones ignimbrite - bulk rock	0.280708	101.302	0.546805	158.922	292.918	0.937338	0.0469341	0.983707	0.0220825	1.35878	0.00341392	0.937338	0.689838	45.8774	23.5067	21.9701	0.411154	22.1782	0.595997	99.0615
MXZ5_B_29	130061 - Cardones ignimbrite - bulk rock	0.565798	198.822	1.10215	311.911	289.981	0.753951	0.047837	0.605777	0.0227353	0.967165	0.0034485	0.753951	0.779547	91.2152	14.3532	22.1922	0.334053	22.8265	0.43652	97.2213
MXZ5_B_30	130061 - Cardones ignimbrite - bulk rock	0.717016	144.968	1.39671	227.425	165.85	0.729741	0.0475899	0.531013	0.0395462	0.902495	0.00602954	0.729741	0.808582	78.9325	12.6106	38.7522	0.56386	39.3809	0.696974	98.4035
MXZ5_B_33	130061 - Cardones ignimbrite - bulk rock	1.65876	585.852	3.23118	919.083	290.22	0.957725	0.0478059	0.454268	0.0227018	1.06	0.00344567	0.957725	0.903516	89.6726	10.7664	22.174	0.423988	22.7933	0.477721	97.2832
MXZ5_B_35	130061 - Cardones ignimbrite - bulk rock	0.308385	111.46	0.600719	174.858	293.297	0.762571	0.0470665	0.694414	0.0221162	1.03137	0.00340952	0.762571	0.739376	52.6009	16.5728	21.9418	0.334066	22.2117	0.453094	98.7848
MXZ5_B_36	130061 - Cardones ignimbrite - bulk rock	0.523651	185.95	1.02005	291.718	291.838	0.875513	0.0471299	0.77453	0.0222567	1.16894	0.00342656	0.875513	0.74898	55.8148	18.4737	22.0513	0.385453	22.3513	0.516705	98.6578
MXZ5_B_41	130061 - Cardones ignimbrite - bulk rock	0.541192	106.565	1.05422	167.179	162.756	0.846331	0.0469026	0.860122	0.039716	1.20668	0.00614417	0.846331	0.70137	44.2716	20.5598	39.4867	0.666299	39.5468	0.935631	99.848
MXZ5_B_43	130061 - Cardones ignimbrite - bulk rock	0.562352	196.679	1.09543	308.549	287.676	0.690422	0.047773	0.665392	0.0228868	0.958869	0.00347613	0.690422	0.720038	88.0403	15.775	22.3697	0.308349	22.9769	0.435595	97.3575
MXZ5_B_45	130061 - Cardones ignimbrite - bulk rock	2.04875	710.048	3.99087	1113.92	287.647	1.03553	0.0471642	0.386714	0.0225974	1.10538	0.00347649	1.03553	0.936807	57.5493	9.22069	22.372	0.462517	22.6896	0.49593	98.6001
MXZ5_B_46	130061 - Cardones ignimbrite - bulk rock	0.559411	198.844	1.08971	311.946	290.96	0.669209	0.0473144	0.792035	0.0224112	1.0369	0.00343689	0.669209	0.645394	65.1258	18.8582	22.1177	0.295513	22.5047	0.461464	98.28
MXZ5_B_47	130061 - Cardones ignimbrite - bulk rock	0.191042	38.5278	0.372141	60.4423	163.368	0.702483	0.0467907	1.1329	0.0394728	1.33302	0.00612115	0.702483	0.526986	38.5554	27.1093	39.3392	0.550995	39.3092	1.02745	100.076
MXZ5_B_48	130061 - Cardones ignimbrite - bulk rock	2.23404	779.231	4.3518	1222.45	288.618	0.721546	0.048662	0.412849	0.0232365	0.831308	0.00346478	0.721546	0.867965	131.576	9.70883	22.2968	0.3212	23.324	0.383297	95.5958
MXZ5_B_49	130061 - Cardones ignimbrite - bulk rock	0.643785	228.266	1.25406	358.103	291.589	0.903926	0.0478324	0.945822	0.0226077	1.3083	0.00342948	0.903926	0.690914	90.9851	22.4111	22.0701	0.398299	22.6998	0.587206	97.2256
MXZ5_B_50	130061 - Cardones ignimbrite - bulk rock	0.705112	247.323	1.37352	387.999	290.666	0.901065	0.0472498	0.514969	0.0224033	1.03784	0.00344037	0.901065	0.868212	61.8702	12.2688	22.14	0.398295	22.4968	0.461722	98.4139
604_1	Cardones ignimbrite - Unit 1 (bulk rock)	0.456188	159.168	1.14914	322.461	285.325	1.19505	0.0474202	0.864743	0.022905	1.4751	0.00350478	1.19505	0.810147	70.4427	20.5688	22.5537	0.538092	22.995	0.670553	98.0812
604_4	Cardones ignimbrite - Unit 1 (bulk rock)	0.514427	179.55	1.29585	363.753	288.173	1.53805	0.0468515	0.814676	0.0224066	1.74049	0.00347014	1.53805	0.883689	41.6619	19.483	22.3312	0.685705	22.5001	0.774314	99.2493
604_5	Cardones ignimbrite - Unit 1 (bulk rock)	1.59195	549.578	4.01014	1113.4	280.616	1.41873	0.0481274	0.527559	0.0236366	1.51364	0.00356359	1.41873	0.937296	105.537	12.4665	22.9315	0.649484	23.721	0.709531	96.6719
604_6	Cardones ignimbrite - Unit 1 (bulk rock)	1.12965	402.432	2.8456	815.294	290.378	1.26023	0.0472141	0.585604	0.0224086	1.38964	0.00344379	1.26023	0.906872	60.0716	13.9563	22.1619	0.5576	22.5021	0.618331	98.4883
604_9	Cardones ignimbrite - Unit 1 (bulk rock)	1.65111	556.813	4.15917	1128.06	282.73	1.25017	0.0477296	0.466903	0.023266	1.33452	0.00353694	1.25017	0.936799	85.8876	11.0737	22.7603	0.568059	23.3533	0.616006	97.4611
604_10	Cardones ignimbrite - Unit 1 (bulk rock)	1.6237	578.231	4.09012	1171.45	288.555	1.45687	0.0478653	0.632994	0.0228611	1.58845	0.00346554	1.45687	0.917169	92.616	14.9941	22.3017	0.64866	22.9515	0.720709	97.169
604_12	Cardones ignimbrite - Unit 1 (bulk rock)	2.62052	890.967	6.60113	1805.03	277.61	1.25864	0.0479996	0.480688	0.0238291	1.34731	0.00360217	1.25864	0.934189	99.2484	11.3723	23.1794	0.582415	23.9119	0.636605	96.9366
604_13	Cardones ignimbrite - Unit 1 (bulk rock)	0.40322	80.5186	1.01572	163.124	163.402	1.25439	0.0473309	1.00477	0.0399202	1.60719	0.00611987	1.25439	0.780488	65.9559	23.9195	39.331	0.983648	39.7461	1.25213	98.9554
604_14	Cardones ignimbrite - Unit 1 (bulk rock)	2.10234	738.64	5.29582	1496.42	286.521	1.28742	0.0473847	0.484084	0.0227923	1.37543	0.00349014	1.28742	0.936018	68.6604	11.5183	22.4597	0.577271	22.8831	0.622249	98.1499
604_17	Cardones ignimbrite - Unit 1 (bulk rock)	0.933744	324.969	2.35211	658.36	284.98	1.54981	0.0468615	0.606564	0.0226625	1.66428	0.00350902	1.54981	0.931219	42.1747	14.5046	22.581	0.698663	22.7542	0.748691	99.2386
604_18	Cardones ignimbrite - Unit 1 (bulk rock)	0.419189	145.653	1.05594	295.081	286.037	1.30344	0.047726	0.745109	0.0229953	1.50138	0.00349605	1.30344	0.868161	85.7097	17.6726	22.4977	0.585437	23.0846	0.685123	97.4575
604_19	Cardones ignimbrite - Unit 1 (bulk rock)	0.572391	202.858	1.44186	410.974	287.376	1.30558	0.0473509	0.619984	0.0227083	1.44531	0.00347976	1.30558	0.903322	66.9612	14.7566	22.393	0.583678	22.7997	0.651499	98.2165
604_22	Cardones ignimbrite - Unit 1 (bulk rock)	0.296727	109.434	0.747459	221.704	294.542	1.51333	0.0478466	0.762442	0.0223877	1.69455	0.0033951	1.51333	0.89306	91.6903	18.0635	21.8492	0.660148	22.4814	0.753263	97.1878
604_25	Cardones ignimbrite - Unit 1 (bulk rock)	0.38933	137.502	0.980728	278.568	287.045	1.24031	0.0467562	0.835734	0.0224488	1.4956	0.00348377	1.24031	0.829306	36.7904	20.005	22.4188	0.555135	22.5421	0.666631	99.453
604_28	Cardones ignimbrite - Unit 1 (bulk rock)	1.37462	482.21	3.46269	976.918	283.086	1.26624	0.0470996	0.440429	0.02293	1.34065	0.00353249	1.26624	0.944497	54.2821	10.5079	22.7318	0.574638	23.0198	0.610103	98.7486
604_31	Cardones ignimbrite - Unit 1 (bulk rock)	3.70417	1317.73	9.33086	2669.61	290.411	1.16028	0.047284	0.425692	0.0224392	1.2359	0.00344339	1.16028	0.938809	63.5927	10.1386	22.1594	0.513317	22.5325	0.550675	98.3444
604P_1	Cardones ignimbrite - Unit 1 (bulk rock)	0.546007	185.399	1.3754	375.603	281.288	1.42027	0.0488018	0.900804	0.0239107	1.68185	0.00355508	1.42027	0.844469	138.321	21.1575	22.8769	0.648641	23.9928	0.797269	95.3491
604P_2	Cardones ignimbrite - Unit 1 (bulk rock)	1.47975	529.651	3.72751	1073.03	289.302	1.39984	0.047281	0.484668	0.0225238	1.48137	0.0034566	1.39984	0.944963	63.4424	11.5435	22.2442	0.621662	22.6165	0.662443	98.354
604P_5	Cardones ignimbrite - Unit 1 (bulk rock)	1.13921	397.895	2.86969	806.102	287.547	1.35892	0.0476511	0.530837	0.0228386	1.45892	0.00347769	1.35892	0.931455	81.983	12.5993	22.3797	0.60716	22.9291	0.66132	97.6041
604P_8	Cardones ignimbrite - Unit 1 (bulk rock)	1.38674	484.336	3.49322	981.225	287.075	1.27184	0.0472387	0.603115	0.0226782	1.40759	0.00348341	1.27184	0.903555	61.3113	14.3703	22.4165	0.569188	22.7699	0.633683	98.4482
604P_9	Cardones ignimbrite - Unit 1 (bulk rock)	0.549551	178.92	1.38433	362.477	263.731	1.12205	0.0487275	0.624765	0.0254636	1.28426	0.00379175	1.12205	0.873693	134.741	14.6838	24.3969	0.546434	25.5316	0.647403	95.5559
604P_10	Cardones ignimbrite - Unit 1 (bulk rock)	1.18362	417.936	2.98156	846.704	283.926	1.15563	0.0477386	0.670552	0.0231724	1.33608	0.00352205	1.15563	0.864938	86.3324	15.9024	22.6647	0.522897	23.2604	0.614304	97.4391
604P_11	Cardones ignimbrite - Unit 1 (bulk rock)	0.51202	181.444	1.28979	367.591	287.635	1.18371	0.0472571	0.694413	0.0226428	1.37236	0.00347662	1.18371	0.862535	62.2393	16.5428	22.3729	0.528721	22.7347	0.616884	98.4085
604P_12	Cardones ignimbrite - Unit 1 (bulk rock)	1.30897	462.619	3.29731	937.228	288.222	1.1587	0.0479026	0.451308	0.0229054	1.24349	0.00346955	1.1587	0.931813	94.461	10.6867	22.3275	0.516499	22.9954	0.565305	97.0953
604P_15	Cardones ignimbrite - Unit 1 (bulk rock)	1.16489	413.958	2.93437	838.645	289.298	1.18517	0.0485979	0.540694	0.0231515	1.30268	0.00345664	1.18517	0.909793	128.478	12.7226	22.2445	0.526342	23.2396	0.598424	95.7182
604P_16	Cardones ignimbrite - Unit 1 (bulk rock)	0.574368	202.132	1.44684	409.503	289.227	1.12537	0.0468881	0.661223	0.0223424	1.30525	0.00345749	1.12537	0.862188	43.5294	15.8076	22.25	0.499907	22.4363	0.579112	99.1693
604P_17	Cardones ignimbrite - Unit 1 (bulk rock)	5.10472	1843.13	12.8589	3734.03	293.238	1.24795	0.0475135	0.424836	0.0223307	1.31828	0.0034102	1.24795	0.946649	75.1113	10.0963	21.9462	0.5468	22.4248	0.584594	97.8658
604P-27	Cardones ignimbrite - Unit 1 (pumice)	1.43237	496.142	3.60816	1005.14	289.028	1.34352	0.0469658	0.426898	0.0223948	1.40971	0.00345987	1.34352	0.953046	47.4908	10.1981	22.2652	0.597217	22.4884	0.626882	99.0075
604P-28	Cardones ignimbrite - Unit 1 (pumice)	0.250903	87.7724	0.632028	177.82	284.184	1.48597	0.0474533	1.10265	0.023013	1.85039	0.00351885	1.48597	0.803057	72.0984	26.2196	22.6441	0.671755	23.1022	0.844957	98.0174
604P_35	Cardones ignimbrite - Unit 1 (pumice)	0.248735	98.466	0.626567	199.484	321.567	1.26609	0.0470579	0.91003	0.0201682	1.55921	0.00310978	1.26609	0.812007	52.1644	21.7204	20.0158	0.506029	20.2747	0.625786	98.7231
604P_38	Cardones ignimbrite - Unit 1 (pumice)	0.160035	56.2761	0.40313	114.011	286.788	1.21046	0.0482378	1.14578	0.023181	1.66674	0.00348689	1.21046	0.726243	110.949	27.0483	22.4389	0.542259	23.2689	0.766557	96.4327
604P_39	Cardones ignimbrite - Unit 1 (pumice)	0.389616	137.864	0.981448	279.301	289.618	1.2282	0.0483736	0.831063	0.0230191	1.48295	0.00345282	1.2282	0.828214	117.581	19.5946	22.22	0.544848	23.1082	0.677401	96.156
604P_40	Cardones ignimbrite - Unit 1 (pumice)	2.62032	907.024	6.60062	1837.56	284.233	1.18074	0.0477284	0.437796	0.0231424	1.25929	0.00351824	1.18074	0.937623	85.8283	10.3835	22.6402	0.533684	23.2306	0.578274	97.4586
604P_43	Cardones ignimbrite - Unit 1 (pumice)	0.585977	194.718	1.47608	394.483	273.297	1.29926	0.0488359	0.731427	0.0246269	1.491	0.00365902	1.29926	0.871406	139.958	17.1741	23.5445	0.610664	24.7028	0.727485	95.3112
604P_47	Cardones ignimbrite - Unit 1 (pumice)	1.71803	611.381	4.32774	1238.61	291.513	1.20101	0.0473044	0.484536	0.022364	1.29507	0.00343038	1.20101	0.927372	64.6195	11.5378	22.0758	0.529335	22.4578	0.575138	98.299
604P_48	Cardones ignimbrite - Unit 1 (pumice)	0.163485	58.7169	0.411821	118.956	292.581	1.20205	0.0481656	1.04822	0.022688	1.59489	0.00341785	1.20205	0.753686	107.411	24.7614	21.9953	0.527865	22.7796	0.718274	96.5573
604P_50	Cardones ignimbrite - Unit 1 (pumice)	1.5843	550.079	3.99087	1114.41	288.662	1.18461	0.0487413	0.572971	0.0232709	1.3159	0.00346426	1.18461	0.900227	135.403	13.4648	22.2934	0.527248	23.3581	0.607542	95.442
604P_51	Cardones ignimbrite - Unit 1 (pumice)	3.07378	1071.73	7.74289	2171.24	289.136	1.30841	0.0473176	0.439506	0.0225542	1.38026	0.00345858	1.30841	0.947948	65.2853	10.4642	22.257	0.581395	22.6467	0.618056	98.2793
604P_52	Cardones ignimbrite - Unit 1 (pumice)	1.53197	540.221	3.85905	1094.44	284.292	1.335	0.0475136	0.691487	0.0230335	1.50345	0.00351751	1.335	0.887953	75.1163	16.4334	22.6356	0.603279	23.1225	0.687182	97.8941
604P_53	Cardones ignimbrite - Unit 1 (pumice)	1.02203	353.569	2.57451	716.302	285.68	1.26987	0.0478756	0.481364	0.0230962	1.35805	0.00350043	1.26987	0.935074	93.1279	11.4013	22.5258	0.571075	23.1848	0.622396	97.1575
604P_56	Cardones ignimbrite - Unit 1 (pumice)	2.69203	969.724	6.78126	1964.58	292.201	1.26265	0.0483745	0.449194	0.0228161	1.34018	0.0034223	1.26265	0.942156	117.624	10.5909	22.0239	0.555199	22.9067	0.606925	96.1461
MXZ5_F_1a	130015 - Cardones ignimbrite - bulk rock	2.99309	992.736	4.49454	1276.69	289.655	0.724138	0.0479606	0.496503	0.0228196	0.878004	0.00345238	0.724138	0.824755	97.3251	11.7506	22.2171	0.321204	22.9103	0.397723	96.9746
MXZ5_F_2	130015 - Cardones ignimbrite - bulk rock	1.05021	340.199	1.57704	437.507	283.478	0.708694	0.0489	0.760319	0.0237737	1.03939	0.00352762	0.708694	0.681836	143.038	17.8423	22.7005	0.32118	23.8569	0.490034	95.1526
MXZ5_F_6	130015 - Cardones ignimbrite - bulk rock	2.11965	697.803	3.18295	897.398	288.773	0.95295	0.0473064	0.36965	0.0225772	1.02213	0.00346293	0.95295	0.932316	64.7204	8.80195	22.2849	0.423981	22.6695	0.458187	98.3035
MXZ5_F_7	130015 - Cardones ignimbrite - bulk rock	0.502917	170.041	0.7552	218.678	292.782	0.936903	0.0469962	0.564871	0.022122	1.09401	0.00341551	0.936903	0.85639	49.0336	13.4902	21.9803	0.411153	22.2174	0.48073	98.9325
MXZ5_F_8	130015 - Cardones ignimbrite - bulk rock	3.76306	1259.1	5.65076	1619.24	288.544	0.750213	0.0478479	0.366576	0.0228537	0.834984	0.00346568	0.750213	0.898476	91.7539	8.68471	22.3026	0.334047	22.9441	0.378792	97.204
MXZ5_F_10	130015 - Cardones ignimbrite - bulk rock	0.982892	331.984	1.47595	426.942	292.29	0.496893	0.0476957	0.557531	0.022489	0.746822	0.00342126	0.496893	0.665343	84.1996	13.2273	22.0172	0.218427	22.582	0.333517	97.499
MXZ5_F_11	130015 - Cardones ignimbrite - bulk rock	0.189506	62.996	0.28457	81.0149	290.647	0.726619	0.0478056	0.939801	0.0226683	1.18794	0.00344059	0.726619	0.611663	89.6592	22.2739	22.1414	0.321208	22.76	0.534593	97.2824
MXZ5_F_13	130015 - Cardones ignimbrite - bulk rock	0.562985	186.774	0.845401	240.198	286.559	0.601773	0.0481517	0.533411	0.0231582	0.804151	0.00348969	0.601773	0.748334	106.73	12.602	22.4568	0.269802	23.2463	0.369555	96.6039
MXZ5_F_14	130015 - Cardones ignimbrite - bulk rock	1.03945	351.791	1.56088	452.415	289.669	0.550371	0.0474188	0.501349	0.0225608	0.744486	0.00345222	0.550371	0.739263	70.3689	11.9253	22.2161	0.244116	22.6533	0.333511	98.0702
MXZ5_F_17	130015 - Cardones ignimbrite - bulk rock	2.12608	711.963	3.19261	915.608	287.267	0.689441	0.0474339	0.368919	0.0227567	0.78194	0.00348108	0.689441	0.881706	71.1269	8.774	22.4015	0.308347	22.8477	0.35326	98.047
MXZ5_F_19	130015 - Cardones ignimbrite - bulk rock	0.374372	122.054	0.562172	156.965	285.416	0.770623	0.0480936	0.691965	0.0232228	1.0357	0.00350366	0.770623	0.74406	103.878	16.3566	22.5466	0.346882	23.3104	0.47724	96.723
MXZ5_F_22	130015 - Cardones ignimbrite - bulk rock	2.53962	823.463	3.81359	1059	285.564	0.656798	0.0486928	0.379568	0.0235	0.758587	0.00350184	0.656798	0.865817	133.067	8.9237	22.5349	0.295493	23.5854	0.353646	95.5458
MXZ5_F_23	130015 - Cardones ignimbrite - bulk rock	6.03698	1975.25	9.06537	2540.24	285.375	0.6849	0.0482484	0.296779	0.0233009	0.746435	0.00350416	0.6849	0.917561	111.468	7.00535	22.5498	0.30834	23.3879	0.345103	96.4163
MXZ5_C_2	130008p - Cardones ignimbrite - pumice	0.344503	121.348	0.671075	190.37	291.405	0.553669	0.0483599	0.716971	0.0228715	0.905869	0.00343165	0.553669	0.611203	116.911	16.9067	22.084	0.244121	22.9617	0.411254	96.1774
MXZ5_C_4	130008p - Cardones ignimbrite - pumice	0.425827	153.155	0.82949	240.269	297.863	0.595726	0.0467173	0.719434	0.0216156	0.934064	0.00335725	0.595726	0.637779	34.8012	17.2276	21.606	0.256989	21.7143	0.401264	99.5012
MXZ5_C_5	130008p - Cardones ignimbrite - pumice	0.830556	296.252	1.61788	464.759	292.391	0.467825	0.0469848	0.47916	0.0221462	0.669668	0.00342008	0.467825	0.698593	48.4566	11.4445	22.0096	0.205579	22.2415	0.294607	98.9574
MXZ5_C_6	130008p - Cardones ignimbrite - pumice	2.36557	838.535	4.60802	1315.49	292.555	0.702133	0.0480372	0.286285	0.0226295	0.758254	0.00341816	0.702133	0.925986	101.102	6.77068	21.9973	0.308366	22.7215	0.34069	96.8125
MXZ5_C_7	130008p - Cardones ignimbrite - pumice	2.49059	881.045	4.85155	1382.18	292.598	0.672976	0.0466228	0.302797	0.02196	0.737958	0.00341766	0.672976	0.911943	29.9515	7.25743	21.9941	0.295518	22.0566	0.321975	99.7167
MXZ5_C_9	130008p - Cardones ignimbrite - pumice	7.04289	2522.78	13.7192	3957.73	295.874	0.946797	0.0483152	0.397575	0.0225052	1.02688	0.00337982	0.946797	0.92201	114.732	9.3789	21.751	0.411168	22.5981	0.458881	96.2515
MXZ5_C_10	130008p - Cardones ignimbrite - pumice	0.150186	53.8635	0.292555	84.5009	294.884	1.03209	0.0468679	1.17299	0.0219044	1.56241	0.00339117	1.03209	0.660578	42.5029	28.0477	21.8239	0.449708	22.0013	0.679876	99.1939
MXZ5_C_11	130008p - Cardones ignimbrite - pumice	1.77141	633.263	3.45062	993.461	296.75	0.77155	0.0471785	0.440414	0.0219109	0.8884	0.00336984	0.77155	0.868472	58.2736	10.4997	21.6869	0.334079	22.0077	0.386752	98.5422
MXZ5_C_15	130008p - Cardones ignimbrite - pumice	0.583869	212.95	1.13735	334.075	295.193	0.678944	0.0484454	1.11592	0.0226179	1.30623	0.00338762	0.678944	0.519773	121.074	26.2938	21.8011	0.295527	22.71	0.586534	95.9978
MXZ5_C_16	130008p - Cardones ignimbrite - pumice	0.260846	95.4737	0.508115	149.779	300.572	0.631202	0.0469946	0.899751	0.0215479	1.09908	0.00332699	0.631202	0.574302	48.9538	21.4881	21.4115	0.269846	21.647	0.470688	98.9123
MXZ5_C_18	130008p - Cardones ignimbrite - pumice	0.385381	139.694	0.750703	219.151	296.904	0.771951	0.0472422	0.672055	0.021929	1.02351	0.00336809	0.771951	0.754222	61.4865	16.0124	21.6756	0.33408	22.0257	0.445917	98.4104
MXZ5_C_19	130008p - Cardones ignimbrite - pumice	0.357545	129.33	0.69648	202.892	299.635	1.10865	0.0475841	0.767736	0.0218864	1.34853	0.00333739	1.10865	0.82212	78.6415	18.2334	21.4784	0.47543	21.9834	0.586363	97.7027
MXZ5_C_21	130008p - Cardones ignimbrite - pumice	0.578964	208.462	1.12779	327.034	295.56	0.827568	0.0478678	0.945158	0.0223205	1.25626	0.00338341	0.827568	0.658755	92.7416	22.388	21.774	0.359772	22.4146	0.556849	97.1421
MXZ5_C_22	130008p - Cardones ignimbrite - pumice	2.54872	918.146	4.96478	1440.38	298.38	0.924978	0.0480537	0.332807	0.0221954	0.983029	0.00335143	0.924978	0.940948	101.914	7.86974	21.5686	0.39833	22.2904	0.433374	96.7619
MXZ5_C_23	130008p - Cardones ignimbrite - pumice	0.324713	116.487	0.632525	182.744	294.228	0.764993	0.0463104	0.602995	0.021692	0.974072	0.00339872	0.764993	0.785355	13.8088	14.4968	21.8724	0.334069	21.7902	0.419896	100.377
MXZ5_C_24	130008p - Cardones ignimbrite - pumice	0.181112	64.0906	0.352797	100.545	295.662	0.650457	0.0487198	1.37243	0.0227099	1.51877	0.00338224	0.650457	0.428278	134.368	32.2584	21.7665	0.28268	22.8013	0.684651	95.4616
MXZ5_C_25	130008p - Cardones ignimbrite - pumice	0.147877	54.3456	0.288057	85.2572	296.252	0.711004	0.0486024	1.09229	0.0226101	1.30331	0.00337551	0.711004	0.545536	128.694	25.7007	21.7233	0.30838	22.7022	0.585028	95.6879
MXZ5_C_27a	130008p - Cardones ignimbrite - pumice	0.517676	187.174	1.00841	293.638	294.263	0.735657	0.0477353	0.587423	0.0223568	0.941412	0.00339832	0.735657	0.78144	86.1708	13.9314	21.8699	0.321221	22.4507	0.417983	97.4128
MXZ5_C_27b	130008p - Cardones ignimbrite - pumice	0.277548	100.743	0.54065	158.045	297.837	0.714809	0.047384	0.91327	0.021926	1.15975	0.00335754	0.714809	0.616349	68.6231	21.7305	21.6078	0.308385	22.0227	0.50519	98.1162
MXZ5_C_29	130008p - Cardones ignimbrite - pumice	0.403637	144.624	0.786265	226.886	295.462	0.738656	0.0474377	0.871438	0.0221273	1.14237	0.00338453	0.738656	0.646598	71.3204	20.7247	21.7812	0.321225	22.2227	0.502092	98.0134
MXZ5_C_30a	130008p - Cardones ignimbrite - pumice	0.271711	96.5802	0.52928	151.515	294.614	0.707074	0.0461805	0.977852	0.0216029	1.20671	0.00339427	0.707074	0.585952	7.05381	23.539	21.8438	0.308374	21.7016	0.518061	100.655
MXZ5_C_30b	130008p - Cardones ignimbrite - pumice	0.616816	223.738	1.20153	350.999	297.093	0.594187	0.0468321	0.637073	0.0217248	0.87116	0.00336595	0.594187	0.682064	40.6717	15.2385	21.6618	0.256986	21.8228	0.376097	99.2623
MXZ5_C_32	130008p - Cardones ignimbrite - pumice	0.212048	76.8992	0.413059	120.639	297.535	0.654578	0.0473236	0.591819	0.0219202	0.882452	0.00336094	0.654578	0.741771	65.5882	14.0899	21.6297	0.282686	22.017	0.384324	98.241
MXZ5_C_34	130008p - Cardones ignimbrite - pumice	0.180578	63.9982	0.351757	100.4	295.969	0.710325	0.0472858	0.915057	0.0220186	1.1584	0.00337873	0.710325	0.613195	63.683	21.7932	21.744	0.308379	22.1148	0.506689	98.3235
MXZ5_C_35	130008p - Cardones ignimbrite - pumice	1.28295	452.239	2.49912	709.471	293.366	0.586731	0.0470126	0.478937	0.0220857	0.757386	0.00340871	0.586731	0.774679	49.8676	11.4361	21.9366	0.256975	22.1814	0.3323	98.8966
MXZ5_C_36	130008p - Cardones ignimbrite - pumice	0.407034	146.929	0.792882	230.502	298.409	0.805705	0.0465967	0.680373	0.0215203	1.05455	0.0033511	0.805705	0.76403	28.6047	16.3113	21.5665	0.346934	21.6195	0.451056	99.7545
MXZ5_C_37	130008p - Cardones ignimbrite - pumice	0.454799	163.563	0.885926	256.597	294.91	0.707784	0.047356	0.710644	0.0221305	1.00298	0.00339086	0.707784	0.70568	67.2181	16.9136	21.8219	0.308375	22.2259	0.440904	98.1824
130008P_2	130008p - Cardones ignimbrite - pumice	1.45725	514.23	3.67083	1041.79	287.509	1.35884	0.0489167	0.640533	0.0234484	1.50224	0.00347816	1.35884	0.904542	143.842	15.0291	22.3827	0.607208	23.5342	0.69871	95.1072
130008P_6	130008p - Cardones ignimbrite - pumice	1.14425	402.201	2.88238	814.826	277.206	1.41096	0.0474109	0.53252	0.0235712	1.50811	0.00360743	1.41096	0.935584	69.9736	12.6677	23.2131	0.653844	23.6561	0.705025	98.1275
130008P_8	130008p - Cardones ignimbrite - pumice	1.14951	413.544	2.89563	837.806	288.876	1.6936	0.0474021	0.583998	0.0226148	1.79146	0.00346169	1.6936	0.945373	69.5343	13.8934	22.277	0.75322	22.7069	0.804223	98.1067
130008P_10	130008p - Cardones ignimbrite - pumice	2.8204	1020.49	7.10463	2067.43	292.641	1.23166	0.0476322	0.530968	0.0224322	1.34124	0.00341715	1.23166	0.918303	81.0413	12.6046	21.9908	0.54076	22.5255	0.597413	97.6263
130008P_11	130008p - Cardones ignimbrite - pumice	2.74678	992.584	6.91918	2010.89	301.606	1.18205	0.0470656	0.413075	0.0215065	1.25214	0.00331558	1.18205	0.944018	52.5579	9.85848	21.3382	0.503602	21.6058	0.535214	98.7617
130008P_13	130008p - Cardones ignimbrite - pumice	0.444625	164.45	1.12002	333.162	301.242	1.38536	0.0474637	1.10243	0.0217146	1.77047	0.00331959	1.38536	0.78248	72.6217	26.2118	21.364	0.59093	21.8127	0.76385	97.9431
130010P_1	Cardones ignimbrite - Unit 1 (pumice)	0.977348	335.63	1.46762	431.631	277.677	0.860799	0.0486537	0.463683	0.024148	0.977741	0.0036013	0.860799	0.880396	131.179	10.9051	23.1738	0.398231	24.2282	0.468061	95.6482
130010P_4	Cardones ignimbrite - Unit 1 (pumice)	0.377583	129.503	0.566994	166.545	282.553	0.84766	0.0481945	0.906619	0.0235073	1.24116	0.00353915	0.84766	0.682956	108.827	21.4109	22.7746	0.385409	23.5927	0.578731	96.5324
130010P_6	Cardones ignimbrite - Unit 1 (pumice)	0.896029	299.925	1.34551	385.713	274.212	1.2888	0.0475786	0.581888	0.0239128	1.41407	0.00364681	1.2888	0.91141	78.3683	13.8203	23.4661	0.603733	23.9949	0.670433	97.796
130010P_7	Cardones ignimbrite - Unit 1 (pumice)	4.15906	1401.12	6.24541	1801.89	274.395	1.12502	0.0470646	0.325357	0.0236387	1.17112	0.00364438	1.12502	0.960634	52.5048	7.76508	23.4505	0.526665	23.723	0.549062	98.851
130010P_9	Cardones ignimbrite - Unit 1 (pumice)	0.998731	349.509	1.49973	449.48	287.274	0.402184	0.0469615	0.666213	0.0225295	0.778198	0.00348099	0.402184	0.516815	47.2688	15.9157	22.401	0.179871	22.6222	0.348137	99.0222
130010P_12	Cardones ignimbrite - Unit 1 (pumice)	2.38856	800.316	3.58676	1029.23	271.23	1.19341	0.0472851	0.371599	0.0240266	1.24993	0.00368691	1.19341	0.954785	63.6476	8.85014	23.7237	0.565176	24.1078	0.595385	98.4068
130010P_14	Cardones ignimbrite - Unit 1 (pumice)	2.41784	835.618	3.63072	1074.63	284.65	0.711624	0.0477766	0.469737	0.0231319	0.852679	0.00351309	0.711624	0.834574	88.2219	11.1361	22.6072	0.321184	23.2202	0.391418	97.36
130010P_15	Cardones ignimbrite - Unit 1 (pumice)	1.85211	635.797	2.7812	817.656	281.316	0.731423	0.0471031	0.456653	0.023076	0.862271	0.00355472	0.731423	0.848252	54.4558	10.8946	22.8745	0.334018	23.1647	0.394886	98.7474
130010P_16	Cardones ignimbrite - Unit 1 (pumice)	5.11926	1733.19	7.68728	2228.94	280.103	0.700257	0.0485552	0.381622	0.0238904	0.797493	0.00357012	0.700257	0.878073	126.406	8.98307	22.9735	0.321166	23.9727	0.377813	95.8318
130010P_17	Cardones ignimbrite - Unit 1 (pumice)	2.34097	800.497	3.51529	1029.47	280.619	0.533176	0.0473497	0.403556	0.0232544	0.668681	0.00356355	0.533176	0.797355	66.8979	9.60538	22.9313	0.244089	23.3418	0.308557	98.2413
130010P_20	Cardones ignimbrite - Unit 1 (pumice)	1.41298	496.013	2.12179	637.889	286.083	0.743817	0.0465699	0.553551	0.0224346	0.92719	0.00349548	0.743817	0.802227	27.2279	13.2743	22.4941	0.334037	22.528	0.41307	99.8494
130010P_24	Cardones ignimbrite - Unit 1 (pumice)	2.67091	919.121	4.01074	1182.02	287.213	0.545705	0.0470234	0.357244	0.022564	0.65224	0.00348174	0.545705	0.836663	50.4144	8.52944	22.4057	0.244109	22.6564	0.292233	98.8935
130010P_26	Cardones ignimbrite - Unit 1 (pumice)	0.384469	134.697	0.577334	173.225	287.136	0.602985	0.0469422	0.826901	0.0225311	1.0234	0.00348267	0.602985	0.589196	46.2868	19.7582	22.4117	0.269804	22.6237	0.457841	99.0629
130010P_27	Cardones ignimbrite - Unit 1 (pumice)	1.31087	448.558	1.96845	576.86	283.387	0.821824	0.0476349	0.470739	0.023166	0.947095	0.00352874	0.821824	0.867731	81.1761	11.1745	22.7077	0.372567	23.254	0.435377	97.6505
130010P_29	Cardones ignimbrite - Unit 1 (pumice)	1.7884	624.623	2.68553	803.286	284.328	0.710819	0.0480084	0.433463	0.0232704	0.832559	0.00351707	0.710819	0.853777	99.6829	10.2542	22.6327	0.321183	23.3577	0.38442	96.8963
130010P_30	Cardones ignimbrite - Unit 1 (pumice)	0.38312	133.973	0.575308	172.294	282.987	0.650871	0.0483178	1.18565	0.0235313	1.35255	0.00353373	0.650871	0.481217	114.857	27.9691	22.7397	0.295484	23.6165	0.631283	96.2874
130010P_35	Cardones ignimbrite - Unit 1 (pumice)	0.461046	158.173	0.692325	203.416	285.639	0.856917	0.0473481	0.661543	0.022845	1.08256	0.00350092	0.856917	0.791562	66.8175	15.7462	22.529	0.385424	22.9354	0.490896	98.228
130010P_37	Cardones ignimbrite - Unit 1 (pumice)	1.28054	445.908	1.92291	573.452	286.453	0.773424	0.0479399	0.522586	0.0230648	0.933424	0.00349097	0.773424	0.828588	96.3044	12.3703	22.4651	0.346886	23.1536	0.427262	97.0262
130010P_38	Cardones ignimbrite - Unit 1 (pumice)	1.67978	571.684	2.52242	735.204	285.328	0.627721	0.0474104	0.41999	0.0229	0.755265	0.00350474	0.627721	0.831127	69.9511	9.99083	22.5535	0.282645	22.9901	0.343312	98.1012
130010P_41	Cardones ignimbrite - Unit 1 (pumice)	1.06503	358.249	1.59929	460.72	282.329	0.875221	0.0466894	0.407082	0.0227913	0.96526	0.00354196	0.875221	0.90672	33.3694	9.75064	22.7926	0.398255	22.8821	0.436709	99.609
130010P_42	Cardones ignimbrite - Unit 1 (pumice)	3.96298	1353.25	5.95097	1740.32	288.116	0.749102	0.0471336	0.297489	0.022546	0.806011	0.00347082	0.749102	0.929395	55.9998	7.09529	22.3356	0.334045	22.6385	0.360836	98.662
130010P_43	Cardones ignimbrite - Unit 1 (pumice)	0.290799	100.17	0.436675	128.822	287.121	0.717802	0.047304	0.942766	0.0227059	1.18493	0.00348286	0.717802	0.605778	64.5992	22.4493	22.4129	0.321194	22.7973	0.534103	98.3137
MXZ5_D_4	MD130015 - MICRODIORITE ENCLAVE IN CARDONES IGNIMBRITE	2.54418	844.039	3.82044	1085.46	288.323	0.749641	0.047061	0.352985	0.0224951	0.828589	0.00346833	0.749641	0.90472	52.3232	8.42472	22.3196	0.334046	22.588	0.370123	98.8118
MXZ5_D_5	MD130015 - MICRODIORITE ENCLAVE IN CARDONES IGNIMBRITE	1.03841	354.98	1.55932	456.516	290.018	0.696043	0.0473986	0.721683	0.0225241	1.00265	0.00344806	0.696043	0.694205	69.3578	17.1695	22.1894	0.308357	22.6168	0.448421	98.1103
MXZ5_D_7	MD130015 - MICRODIORITE ENCLAVE IN CARDONES IGNIMBRITE	2.22182	738.728	3.33637	950.029	288.82	0.750931	0.0473925	0.369156	0.0226146	0.836764	0.00346237	0.750931	0.897423	69.0504	8.78305	22.2813	0.334048	22.7067	0.375716	98.1267
MXZ5_D_10	MD130015 - MICRODIORITE ENCLAVE IN CARDONES IGNIMBRITE	3.83168	1271.56	5.7538	1635.27	287.276	0.71819	0.0468927	0.282446	0.0224963	0.771733	0.00348098	0.71819	0.930619	43.7646	6.75205	22.4008	0.321195	22.5893	0.344749	99.1659
MXZ5_D_13	MD130015 - MICRODIORITE ENCLAVE IN CARDONES IGNIMBRITE	0.475157	157.437	0.713515	202.469	289.226	1.18583	0.0474197	0.762153	0.0225957	1.40963	0.0034575	1.18583	0.841232	70.4135	18.1287	22.25	0.526763	22.688	0.632344	98.0698
MXZ5_D_15	MD130015 - MICRODIORITE ENCLAVE IN CARDONES IGNIMBRITE	0.605702	197.86	0.909546	254.454	284.903	1.19659	0.0478694	0.61501	0.0231562	1.34539	0.00350996	1.19659	0.889403	92.8198	14.5676	22.5871	0.539582	23.2443	0.618159	97.1726
MXZ5_D_19	MD130015 - MICRODIORITE ENCLAVE IN CARDONES IGNIMBRITE	2.60735	852.722	3.9153	1096.63	281.018	1.37699	0.0474162	0.280743	0.0232541	1.40532	0.00355849	1.37699	0.979842	70.2401	6.67803	22.8988	0.629478	23.3414	0.648351	98.1037
MXZ5_D_20	MD130015 - MICRODIORITE ENCLAVE IN CARDONES IGNIMBRITE	2.96047	1002.88	4.44556	1289.74	290.017	0.754044	0.0482288	0.296851	0.0229186	0.810372	0.00344807	0.754044	0.930491	110.506	7.00828	22.1895	0.334053	23.0085	0.368649	96.4403
MXZ5_D_21a	MD130015 - MICRODIORITE ENCLAVE IN CARDONES IGNIMBRITE	2.59453	875.715	3.89605	1126.2	290.851	1.27974	0.0468512	0.354108	0.0222002	1.32783	0.00343819	1.27974	0.963785	41.6482	8.46854	22.126	0.565316	22.2951	0.585461	99.2414
MXZ5_E_1	MC1304 - Poconchile ignimbrite	0.586543	76.6941	0.880776	98.6311	113.356	0.714141	0.0476822	1.08633	0.0579721	1.30004	0.00882179	0.714141	0.549323	83.5312	25.7762	56.6195	0.805095	57.2208	1.44561	98.9491
MXZ5_E_2	MC1304 - Poconchile ignimbrite	2.67891	843.772	4.02276	1085.12	276.026	0.690066	0.0474674	0.368728	0.0237001	0.782401	0.00362284	0.690066	0.881985	72.805	8.76669	23.3121	0.321149	23.784	0.36778	98.0162
MXZ5_E_4	MC1304 - Poconchile ignimbrite	0.3893	121.728	0.584588	156.546	273.333	0.819999	0.0478282	0.816913	0.0241156	1.15747	0.00365854	0.819999	0.708439	90.7803	19.3573	23.5414	0.385363	24.196	0.553352	97.2948
MXZ5_E_6	MC1304 - Poconchile ignimbrite	0.486809	155.713	0.731012	200.252	277.717	0.777606	0.0482569	0.571303	0.0239477	0.964914	0.00360079	0.777606	0.805882	111.884	13.4843	23.1705	0.359694	24.0295	0.45818	96.4253
1 concentration uncertainty c.20%
2 data not corrected for common-Pb
3 data corrected/not corrected for common-Pb
4 Concordance calculated as (206Pb-238U age/207Pb-235Pb age)*100
Decay constants of Jaffey et al. (1971) used
Uncertainties quoted without components related to systematic error unless otherwise stated
Total systematic uncertainties (ssys): 206Pb/238U = 2.0%, 207Pb/206Pb = 0.55% (2s)
