# Supplementary material for: Time scales for pluton growth, magma chamber formation and super-eruptions
Source: Research Square preprint supplement (doi:10.21203/rs.3.rs-447477/v1), 2021-05-25
Supplement: Supplementary file 2 [file 566147a7abefd217dd2217f5.xlsx]

## Sheet: Irradiation details
	Samples were co-irradiated with FCs and for 15.02 hours in the CLICIT facility of the OSU TRIGA reactor

## Sheet: Parameters
	Atmospheric argon ratios
	(40Ar/36Ar)Atm	298.56	0.31	Lee et al., 2006
	(38Ar/36Ar)Atm	0.1885	0.0003	Lee et al., 2006
	Interfering isotope production ratios
	(40Ar/39Ar)K	0.00073	9.2e-05	Renne et al., 2005
	(38Ar/39Ar)K	0.0122	0	Renne et al., 2005
	(37Ar/39Ar)K	0.000224	0.00016	Renne et al., 2005
	(39Ar/37Ar)Ca	0.000695	9e-05	Renne et al., 2005
	(38Ar/37Ar)Ca	1.96e-05	8e-07	Renne et al., 2005
	(36Ar/37Ar)Ca	0.000265	2e-05	Renne et al., 2005
	(36Cl/38Cl)Cl	263	2	Renne et al,, 2008
	Decay constants
	40K λε	5.757e-11	1.6e-13	Renne et al., 2011
	40K λβ	4.955e-10	1.34e-12	Renne et al., 2011
	39Ar	0.00258	3e-05	Stoenner et al., 1965
	37Ar	0.0543	0.0006	Renne & Norman, 2001
	36Cl λβ	2.35e-06	2e-07	Endt & Firestone, 1998
	Standard age
	Fish Canyon sanidine	28.294	0.036	Renne et al., 2011

## Sheet: Backgrounds and discrimination
		All ages are reported relative to the atmospheric Ar ratios of Lee et al. (2006) which have been independantly verified by Mark et al. (2011)
		Background measurements were made following the measurement of every unknown and every air calibration, the values below are the average for each isotope from n343
		Air calibrations were made following the analysis of ever 3 unknowns and the discrimination values below are determined from n67 runs
		Discrimination data
			D	±
			1.00032	0.0005614
		Background data
			40Ar	±	39Ar	±	38Ar	±	37Ar	±	36Ar	±
			0.00861	0.0012	0.0004296	7.9e-05	0.0001167	2.3e-05	0.0006901	2.6e-05	0.0001724	2e-05

## Sheet: Data summary
Run_ID	Sample	Ar40	±	Ar39	±	Ar38	±	Ar37	±	Ar36	±	Moles 39Ar	40/39	±	40Ar*/39Ar	±	%40Ar*	±	Age	±
Sample MZ10P, J: 0.0039161 ± 2.04e-6
92088-1	MZ10P	6.85819	0.0064133	2.08726	0.0074004	0.0250138	9.87e-05	0.0020505	2.86e-05	0.0003817	2.24e-05	1.46108e-13	3.28361	0.0120402	3.22878	0.0122806	98.3517	0.163423	22.7186	0.085869
92088-2	MZ10P	3.17113	0.0032311	1.00124	0.0038008	0.0120018	5.14e-05	0.0008863	2.91e-05	9.44e-05	2.11e-05	7.00868e-14	3.16515	0.0124405	3.1367	0.01385	99.1237	0.245082	22.0746	0.0968773
92088-3	MZ10P	5.54986	0.0057271	1.53775	0.0056006	0.0183448	7.46e-05	0.0016142	2.91e-05	0.0001951	2.12e-05	1.07643e-13	3.60674	0.013653	3.56865	0.0141358	98.9637	0.184662	25.0935	0.0987112
92088-4	MZ10P	3.39535	0.0035114	0.90589	0.0034009	0.0108457	5.41e-05	0.0009055	2.82e-05	7.55e-05	2.16e-05	6.34123e-14	3.74565	0.0145858	3.72052	0.0161537	99.3482	0.239616	26.1537	0.112736
92088-5	MZ10P	3.65523	0.0036056	1.11742	0.0041008	0.0134039	6.05e-05	0.0019602	2.86e-05	0.000178	2.21e-05	7.82194e-14	3.26901	0.0124226	3.2216	0.0136109	98.5709	0.227887	22.6683	0.0951737
92088-6	MZ10P	5.49348	0.0050448	1.73063	0.0062005	0.0207338	8.23e-05	0.002037	2.95e-05	0.000235	2.12e-05	1.21144e-13	3.1722	0.0117328	3.13152	0.0121585	98.7398	0.173057	22.0384	0.0850473
92088-7	MZ10P	8.35102	0.0087824	2.06812	0.0073004	0.0244899	9.48e-05	0.0024049	2.86e-05	6.1e-05	2.16e-05	1.44768e-13	4.03535	0.0148634	4.02637	0.0151621	99.795	0.167533	28.2869	0.105691
92088-8	MZ10P	6.95173	0.0047539	2.17515	0.0076004	0.0261766	9.97e-05	0.0022917	2.86e-05	0.0006154	2.24e-05	1.52261e-13	3.1939	0.0113718	3.10925	0.0115032	97.3714	0.135492	21.8826	0.0804703
92088-9	MZ10P	6.09861	0.005142	1.93019	0.0069005	0.0230909	9e-05	0.0018022	2.91e-05	0.0002658	2.09e-05	1.35113e-13	3.15754	0.0115979	3.11615	0.0119074	98.7119	0.156756	21.9309	0.0832957
92088-10	MZ10P	6.35954	0.0061188	2.02034	0.0073004	0.0241559	9.87e-05	0.001982	2.91e-05	0.0002338	2.13e-05	1.41424e-13	3.14571	0.011763	3.11091	0.0120649	98.9164	0.16843	21.8942	0.0843991
92088-11	MZ10P	4.23561	0.0040804	1.34936	0.0049006	0.0161358	7.08e-05	0.0013257	2.86e-05	0.000136	2.19e-05	9.44552e-14	3.13693	0.0117868	3.1066	0.0126518	99.0556	0.205728	21.864	0.0885062
92088-12	MZ10P	3.70266	0.0037	1.17719	0.0044007	0.0141207	6.71e-05	0.0011213	2.91e-05	0.0001014	2.16e-05	8.24033e-14	3.14329	0.0121632	3.11731	0.0132594	99.1961	0.224127	21.9389	0.0927533
92088-13	MZ10P	5.11022	0.0046573	1.58191	0.0057005	0.0190299	8.04e-05	0.0017624	2.82e-05	0.0006389	2.21e-05	1.10734e-13	3.22831	0.0119997	3.1076	0.012308	96.2823	0.180673	21.871	0.0861011
92088-14	MZ10P	9.18142	0.0076942	2.9116	0.0100003	0.0348293	0.000132	0.0030828	3.05e-05	0.0003426	2.11e-05	2.03812e-13	3.15134	0.0111412	3.116	0.0112374	98.9011	0.136411	21.9298	0.0786093
92088-15	MZ10P	6.85105	0.0037947	2.14374	0.0075004	0.0259256	0.0001026	0.0021095	2.95e-05	0.0004947	2.28e-05	1.50062e-13	3.19376	0.0113133	3.12464	0.0115261	97.8579	0.126192	21.9902	0.0806255
92088-16	MZ10P	1.90902	0.0016971	0.43695	0.0017018	0.0056329	3.86e-05	0.0004988	2.79e-05	0.0017071	2.15e-05	3.05865e-14	4.36611	0.0174425	3.20026	0.0196516	73.3096	0.353988	22.5191	0.137424
92088-17	MZ10P	3.4399	0.0033242	1.05408	0.0039008	0.0126258	5.96e-05	0.0009664	2.86e-05	0.0001183	2.15e-05	7.37856e-14	3.26128	0.0124736	3.22751	0.0137803	98.9861	0.231266	22.7097	0.0963556
92088-18	MZ10P	4.27842	0.0044643	1.34383	0.0051006	0.0161318	7.18e-05	0.001469	2.95e-05	0.0002153	2.2e-05	9.40681e-14	3.18167	0.0125243	3.13366	0.0132824	98.5132	0.212142	22.0533	0.0929081
92088-19	MZ10P	6.96872	0.0066098	2.17503	0.0076004	0.0259807	0.0001007	0.0021171	2.95e-05	0.0001753	2.05e-05	1.52252e-13	3.20187	0.0115934	3.17756	0.0118562	99.2629	0.160116	22.3604	0.0829182
92088-20	MZ10P	5.25049	0.0027731	1.53819	0.0054006	0.018628	8.13e-05	0.0015142	2.91e-05	0.0002156	2.18e-05	1.07673e-13	3.41119	0.0121114	3.36912	0.0126935	98.7874	0.144434	23.6996	0.0887078
92088-21	MZ10P	8.37081	0.0066098	2.5569	0.0089004	0.0306563	0.0001124	0.0029248	3e-05	0.0004441	2.33e-05	1.78983e-13	3.27167	0.0116777	3.21967	0.0118238	98.4319	0.138641	22.6548	0.0826775
92088-22	MZ10P	7.38114	0.0071021	2.31743	0.0083004	0.0277833	0.0001124	0.0025834	2.91e-05	0.0005466	2.28e-05	1.6222e-13	3.18297	0.0118047	3.1124	0.0119333	97.8048	0.163303	21.9046	0.0834784
92088-23	MZ10P	4.72052	0.0035114	1.48386	0.0053006	0.0178281	7.27e-05	0.0013923	2.82e-05	0.0001648	2.11e-05	1.0387e-13	3.17916	0.0116001	3.14574	0.0122462	98.9712	0.169649	22.1379	0.0856562
92088-24	MZ10P	2.76978	0.0032311	0.87303	0.0034009	0.0104512	5.41e-05	0.0007345	2.79e-05	0.0001099	2.17e-05	6.11121e-14	3.17053	0.0128928	3.13262	0.014748	98.8268	0.285374	22.0461	0.10316
92088-25	MZ10P	2.70874	0.0027731	0.84002	0.003101	0.010048	4.7e-05	0.0008148	2.82e-05	0.0001021	2.1e-05	5.88014e-14	3.2225	0.0123451	3.18598	0.0143113	98.8887	0.272396	22.4193	0.100085
92088-26	MZ10P	3.40093	0.002	1.07975	0.0038008	0.0129827	5.78e-05	0.0011594	2.86e-05	7.92e-05	2.18e-05	7.55825e-14	3.14767	0.0112337	3.12557	0.01268	99.3205	0.208413	21.9968	0.0886973
92088-27	MZ10P	3.24602	0.0033242	1.03021	0.0038008	0.012299	5.41e-05	0.0009014	2.74e-05	0.0001025	2.15e-05	7.21147e-14	3.14877	0.0120562	3.11876	0.0134748	99.0695	0.244568	21.9491	0.0942593
92088-28	MZ10P	2.13737	0.0020809	0.67493	0.0026012	0.0081393	4.61e-05	0.0005926	2.78e-05	0.0001006	2.13e-05	4.72451e-14	3.16472	0.0125801	3.11996	0.015573	98.6078	0.327001	21.9575	0.108936
92088-29	MZ10P	4.83329	0.0048508	1.50035	0.0055006	0.0179707	7.84e-05	0.0016462	2.91e-05	0.0005599	2.09e-05	1.05025e-13	3.21933	0.0122369	3.10778	0.0125566	96.5566	0.190209	21.8723	0.0878401
92088-30	MZ10P	2.3329	0.0025942	0.73494	0.0029011	0.008822	4.7e-05	0.0006742	2.82e-05	9.86e-05	2.14e-05	5.14458e-14	3.17219	0.0130092	3.13185	0.015528	98.7507	0.315779	22.0407	0.108616
92088-31	MZ10P	5.34543	0.005	1.57011	0.0057	0.0188833	7.4e-05	0.002098	1.1e-05	0.0002877	7.3e-06	1.09908e-13	3.40226	0.0127547	3.3475	0.0126437	98.4111	0.137506	23.5485	0.0883674
92088-32	MZ10P	2.19679	0.0021	0.66784	0.0026	0.0081414	3.6e-05	0.0013409	9e-06	0.000263	7.6e-06	4.67488e-14	3.28723	0.0131778	3.16999	0.0131852	96.4538	0.168336	22.3074	0.0922153
92088-33	MZ10P	2.62809	0.0026	0.76927	0.0029	0.009273	4.2e-05	0.0014509	1.1e-05	0.0002867	6.6e-06	5.38489e-14	3.4141	0.0133063	3.30309	0.0131587	96.7685	0.156841	23.2381	0.0919823
92088-34	MZ10P	2.09817	0.0022	0.61002	0.0024	0.007464	3.4e-05	0.0013508	9.9e-06	0.0003628	8e-06	4.27014e-14	3.43725	0.0139952	3.26019	0.0138913	94.868	0.184056	22.9382	0.0971196
92088-35	MZ10P	1.79314	0.0017	0.47261	0.0019	0.0057872	3e-05	0.0010511	8e-06	0.0002709	7.4e-06	3.30827e-14	3.79163	0.0156613	3.62096	0.0157107	95.5165	0.179983	25.4587	0.109687
92088-36	MZ10P	7.689	0.0076	2.31795	0.0082	0.0277856	0.0001	0.0028032	1.7e-05	0.0003875	7.6e-06	1.62257e-13	3.31497	0.0121762	3.26495	0.0120506	98.5121	0.141937	22.9714	0.0842491
92088-37	MZ10P	1.73703	0.0019	0.46421	0.0019	0.0057061	3.1e-05	0.001082	7.3e-06	0.0002179	5.5e-06	3.24947e-14	3.73944	0.0158426	3.59984	0.0157002	96.2847	0.178935	25.3113	0.109622
92088-38	MZ10P	3.22292	0.0031	0.97866	0.0037	0.0117556	4.7e-05	0.0014974	1.2e-05	0.0002323	5.8e-06	6.85062e-14	3.29103	0.0128387	3.22022	0.0127084	97.8694	0.145001	22.6587	0.0888629
92088-39	MZ10P	4.64055	0.0042	1.45039	0.0052	0.0174949	7e-05	0.0022014	8.9e-06	0.0004076	6.2e-06	1.01527e-13	3.19741	0.0118231	3.11359	0.0116073	97.4	0.132582	21.9129	0.0811976
92088-40	MZ10P	5.98095	0.0052	1.82165	0.0064	0.0221184	8.4e-05	0.0025437	1.2e-05	0.0012144	6.9e-06	1.27515e-13	3.28109	0.0118752	3.08216	0.0112598	93.9572	0.124259	21.693	0.0787763
92088-41	MZ10P	3.01747	0.0024	0.94365	0.0036	0.0114861	4.9e-05	0.0016135	9e-06	0.0003325	8.1e-06	6.60555e-14	3.19555	0.0124531	3.09055	0.0123355	96.7357	0.136727	21.7518	0.0862987
92088-42	MZ10P	4.10723	0.0038	1.29335	0.0047	0.0155384	6.2e-05	0.0018418	7.9e-06	0.0002842	8.4e-06	9.05345e-14	3.17356	0.0119005	3.10796	0.0118346	97.955	0.143276	21.8736	0.0827888
Sample MZ317, J: 0.0039451 ± 1.69e-6
92087-01	MZ317	4.22188	0.0043	1.11392	0.0041	0.0134591	5.8e-05	0.0017708	1.1e-05	0.0002938	6.2e-06	7.79744e-14	3.78771	0.0144653	3.70902	0.0142883	97.9408	0.149221	26.2651	0.10045
92087-02	MZ317	4.75087	0.0046	1.40461	0.0052	0.0169874	6.5e-05	0.0021963	8.9e-06	0.0003985	8.9e-06	9.83227e-14	3.3802	0.0129347	3.29553	0.0127775	97.5157	0.146431	22.744	0.0876311
92087-03	MZ317	6.55171	0.0068	1.93933	0.0071	0.0232312	9.3e-05	0.0027578	1.3e-05	0.0002858	9.2e-06	1.35753e-13	3.37619	0.0128475	3.33214	0.0127761	98.7159	0.151829	23.6136	0.089951
92087-04	MZ317	4.38696	0.0039	1.28145	0.0047	0.0154555	6.3e-05	0.0020599	9.1e-06	0.0002531	8.3e-06	8.97015e-14	3.42126	0.0129116	3.36234	0.0128529	98.2981	0.136941	23.8262	0.0904807
92087-05	MZ317	7.43598	0.0069	2.22606	0.0079	0.0267745	0.0001	0.0033063	1.5e-05	0.0003398	7.4e-06	1.55824e-13	3.3383	0.0122455	3.29271	0.0121346	98.6554	0.133778	23.336	0.0854471
92087-06	MZ317	3.51004	0.0032	0.97593	0.0036	0.0118267	4.6e-05	0.0017045	1e-05	0.0002902	4.2e-06	6.83151e-14	3.59432	0.0136576	3.50569	0.0134072	97.5532	0.132353	24.8351	0.0943304
92087-07	MZ317	6.84993	0.0065	1.9754	0.0071	0.0237325	8.9e-05	0.0028686	1.3e-05	0.0004445	6.4e-06	1.38278e-13	3.46541	0.0128822	3.39822	0.0126907	98.081	0.135891	24.0787	0.0893263
92087-08	MZ317	6.59456	0.0063	2.00985	0.0072	0.0241657	8.9e-05	0.0028181	1.5e-05	0.0003594	8.8e-06	1.4069e-13	3.27903	0.0121572	3.22559	0.0120483	98.3915	0.139906	22.8633	0.084862
92087-09	MZ317	3.14334	0.0026	0.96143	0.0036	0.0116002	5.2e-05	0.001644	1e-05	0.0002745	7.4e-06	6.73001e-14	3.26736	0.0125293	3.18222	0.0124374	97.4154	0.135272	22.5578	0.0876169
92087-10	MZ317	3.44501	0.0043	1.03411	0.0042	0.0125143	5.7e-05	0.0018237	1.2e-05	0.000445	6.4e-06	7.23877e-14	3.32926	0.0141458	3.20096	0.0137784	96.1668	0.181916	22.6898	0.0970569
92087-11	MZ317	4.067	0.0037	1.23733	0.0045	0.0149225	6.1e-05	0.0019431	1.1e-05	0.0003362	7.5e-06	8.66131e-14	3.28482	0.0123146	3.20376	0.012169	97.5532	0.138595	22.7095	0.0857191
92087-12	MZ317	5.85197	0.0056	1.77033	0.0064	0.0213624	8.3e-05	0.0026675	1.2e-05	0.0005778	8.3e-06	1.23923e-13	3.30348	0.0123539	3.20606	0.0120999	97.0719	0.140012	22.7257	0.0852317
92087-13	MZ317	3.10095	0.0028	0.94409	0.0035	0.0114227	4.8e-05	0.0016766	1.2e-05	0.0002673	7.1e-06	6.60863e-14	3.2825	0.0125249	3.19813	0.0124306	97.4508	0.143505	22.6699	0.0875639
92087-14	MZ317	2.16704	0.0023	0.52639	0.0021	0.0064263	3.3e-05	0.0011733	1e-05	0.0002122	5.6e-06	3.68473e-14	4.11417	0.0169841	3.99424	0.0168298	97.1013	0.166909	28.2692	0.118186
92087-15	MZ317	2.19372	0.0024	0.61428	0.0024	0.0074544	3.5e-05	0.0012803	9.3e-06	0.0001818	7.1e-06	4.29996e-14	3.56893	0.0144802	3.4809	0.0145688	97.5525	0.180897	24.6606	0.102513
92087-16	MZ317	2.50124	0.0029	0.71871	0.0028	0.0087477	4e-05	0.001469	9.4e-06	0.0002923	9.8e-06	5.03097e-14	3.47796	0.014137	3.35687	0.0142826	96.5378	0.199212	23.7877	0.100547
92087-17	MZ317	3.03118	0.003	0.88892	0.0033	0.0107444	4.9e-05	0.0016246	1.1e-05	0.0002184	7.7e-06	6.22244e-14	3.40778	0.0130928	3.3346	0.0130933	97.8727	0.157974	23.6309	0.0921829
92087-18	MZ317	3.39437	0.0032	0.90841	0.0034	0.0111315	4.5e-05	0.0015785	1.2e-05	0.0010918	9.2e-06	6.35887e-14	3.73422	0.014413	3.3757	0.0134645	90.416	0.150737	23.9202	0.0947814
92087-19	MZ317	5.47994	0.0064	1.65315	0.0061	0.0199219	8e-05	0.0025059	1.3e-05	0.0005052	8.1e-06	1.1572e-13	3.31273	0.0128214	3.22153	0.0125912	97.2678	0.168878	22.8347	0.088687
92087-20	MZ317	5.56832	0.0043	1.66394	0.0056	0.0199929	7.3e-05	0.0023938	1.1e-05	0.0002688	8.3e-06	1.16476e-13	3.34433	0.0115478	3.29607	0.0114912	98.5779	0.117302	23.3596	0.0809154
92087-21	MZ317	2.17447	0.0022	0.63693	0.0025	0.0077481	3.5e-05	0.0014386	9.1e-06	0.0002187	7.1e-06	4.45851e-14	3.4118	0.0138293	3.3097	0.0138523	97.0271	0.171474	23.4556	0.0975362
92087-22	MZ317	3.23861	0.003	0.97746	0.0036	0.0118222	4.8e-05	0.0019292	1e-05	0.0003378	6.9e-06	6.84222e-14	3.31117	0.0125749	3.20825	0.0123931	96.9123	0.143911	22.7411	0.0872962
92087-23	MZ317	3.58167	0.0036	1.09891	0.0041	0.0132757	5.1e-05	0.001783	1e-05	0.000234	7.3e-06	7.69237e-14	3.25721	0.0125858	3.19371	0.0125203	98.072	0.153456	22.6387	0.0881972
92087-24	MZ317	4.79486	0.0049	1.43665	0.0053	0.0172877	7.1e-05	0.0021971	1.1e-05	0.0002622	8.6e-06	1.00566e-13	3.33539	0.0127681	3.28091	0.0127058	98.3876	0.15312	22.6437	0.0871443
92087-25	MZ317	1.69402	0.0015	0.51485	0.002	0.0063065	2.9e-05	0.0012816	1.2e-05	0.0001661	6.6e-06	3.60395e-14	3.28821	0.0131011	3.19241	0.0133057	97.1072	0.169686	22.6296	0.09373
92087-26	MZ317	5.68682	0.0058	1.74189	0.0063	0.0209198	8.2e-05	0.0028312	1.2e-05	0.0002692	9.1e-06	1.21932e-13	3.26265	0.0122604	3.21658	0.0122051	98.6093	0.15108	22.7998	0.0859693
92087-27	MZ317	2.48146	0.0022	0.76248	0.0029	0.0092737	3.7e-05	0.001517	8.5e-06	0.0001582	7.3e-06	5.33736e-14	3.25237	0.0127016	3.19069	0.0128014	98.1247	0.152214	22.6174	0.0901786
92087-28	MZ317	2.99119	0.0029	0.79735	0.003	0.009694	4.4e-05	0.0014907	1.2e-05	0.0003328	7e-06	5.58145e-14	3.74901	0.0145663	3.62465	0.0143598	96.7009	0.15196	25.6718	0.100986
92087-29	MZ317	8.03002	0.0072	2.18979	0.0076	0.0263291	0.0001	0.003102	1.5e-05	0.0004089	8.1e-06	1.53285e-13	3.66467	0.0131364	3.60889	0.0130008	98.4969	0.129481	25.561	0.0914343
92087-30	MZ317	2.66853	0.0023	0.7795	0.003	0.0094729	4.3e-05	0.0015326	9.8e-06	0.0002699	7e-06	5.4565e-14	3.42119	0.013493	3.31807	0.0133824	97.0059	0.143444	23.5146	0.0942246
92087-31	MZ317	2.63799	0.0027	0.74173	0.0029	0.0089913	3.8e-05	0.0013574	1e-05	0.0002619	8.4e-06	5.19211e-14	3.55425	0.0143646	3.44903	0.0143752	97.0588	0.171487	24.4364	0.101163
92087-32	MZ317	2.88491	0.0025	0.77896	0.003	0.0094238	4.1e-05	0.0014672	9.1e-06	0.0002131	7.9e-06	5.45272e-14	3.70116	0.0146106	3.61971	0.0146266	97.8178	0.146288	25.6371	0.102864
92087-33	MZ317	2.49305	0.0026	0.68932	0.0027	0.0083792	3.9e-05	0.0014199	1.1e-05	0.0002484	6.2e-06	4.82524e-14	3.61436	0.0146503	3.50707	0.0145006	97.0505	0.163271	24.8448	0.102022
92087-34	MZ317	4.0584	0.0045	1.23875	0.0047	0.0149813	6.2e-05	0.0019063	1.3e-05	0.0002937	7.2e-06	8.67125e-14	3.2741	0.012942	3.20335	0.0128078	97.8603	0.164018	22.7066	0.0902189
92087-35	MZ317	2.63732	0.0026	0.79694	0.0031	0.0096368	4.3e-05	0.0014311	1e-05	0.0002068	8.7e-06	5.57858e-14	3.30718	0.0132713	3.22989	0.0133878	97.6838	0.169474	22.8936	0.0942946
92087-36	MZ317	2.25387	0.0023	0.68375	0.0027	0.0082829	3.5e-05	0.0013592	7.3e-06	0.000205	7.9e-06	4.78625e-14	3.29421	0.0134356	3.20499	0.0135463	97.3123	0.176793	22.7182	0.0954203
92087-37	MZ317	2.15856	0.0023	0.6289	0.0025	0.0077027	3.6e-05	0.0012813	8e-06	0.000436	8.1e-06	4.4023e-14	3.43007	0.0141165	3.22347	0.0138733	93.9959	0.184296	22.8483	0.0977171
92087-38	MZ317	2.53048	0.0027	0.75778	0.0029	0.0091757	3.9e-05	0.0014551	9.5e-06	0.0003028	6.8e-06	5.30446e-14	3.33718	0.0132584	3.21814	0.013102	96.4533	0.168644	22.8108	0.0922859
92087-39	MZ317	1.91378	0.002	0.58173	0.0023	0.0071039	3.4e-05	0.0013042	1e-05	0.0002082	6.9e-06	4.07211e-14	3.28769	0.013445	3.18126	0.0135157	96.7833	0.181022	22.551	0.0952141
92087-40	MZ317	2.48276	0.0028	0.74036	0.0029	0.0089687	4e-05	0.0014457	1.1e-05	0.0002302	8.1e-06	5.18252e-14	3.35129	0.0136603	3.25872	0.0137119	97.2583	0.185116	22.4915	0.0940527
92087-41	MZ317	4.56431	0.0048	1.40639	0.0051	0.0169239	6.6e-05	0.002101	1.3e-05	0.0001965	7e-06	9.84473e-14	3.24331	0.0122458	3.20161	0.0121965	98.7359	0.154805	22.6944	0.0859133
92087-42	MZ317	2.41277	0.0028	0.72387	0.0028	0.0087796	3.9e-05	0.001405	8.6e-06	0.0003566	5.6e-06	5.06709e-14	3.331	0.013452	3.18423	0.0131193	95.6141	0.174956	22.5719	0.09242
92087-43	MZ317	1.91126	0.0025	0.57218	0.0023	0.0069741	3.2e-05	0.0012082	1e-05	0.0002038	8.1e-06	4.00526e-14	3.33815	0.014111	3.23219	0.0143479	96.8462	0.221821	22.9098	0.101056
Sample MZ707, J: 0.003872 ± 7.16e-6
92093-1	MZ707	3.59697	0.0037	1.1768	0.0043	0.0141368	5.5e-05	0.0016645	9.5e-06	0.0002167	5.7e-06	8.2376e-14	3.05451	0.0115949	2.99957	0.0114982	98.224	0.151846	20.8787	0.0795737
92093-2	MZ707	5.99102	0.0058	1.76997	0.0062	0.0213519	7.9e-05	0.0024664	9.7e-06	0.0009207	6.6e-06	1.23898e-13	3.38253	0.0122928	3.22732	0.0118271	95.4314	0.137885	22.4542	0.0817787
92093-3	MZ707	4.34499	0.0043	1.3208	0.0047	0.0160828	6.3e-05	0.0019898	1.1e-05	0.0012025	7.8e-06	9.2456e-14	3.28745	0.0121422	3.01585	0.0113566	91.7579	0.144695	20.9914	0.0785891
92093-4	MZ707	4.20883	0.0042	1.33532	0.0048	0.0160952	6.3e-05	0.0018635	1.3e-05	0.0006406	7.2e-06	9.34724e-14	3.1498	0.0117506	3.00664	0.011375	95.4765	0.14721	20.9277	0.0787194
92093-5	MZ707	3.37656	0.0034	1.07606	0.0039	0.0129421	5.3e-05	0.0017636	1.2e-05	0.0004689	6.6e-06	7.53242e-14	3.13578	0.0117956	3.00589	0.0114945	95.8794	0.151306	20.9225	0.079546
92093-6	MZ707	2.33972	0.0025	0.68559	0.0026	0.008434	3.8e-05	0.001305	8.7e-06	0.0009974	8.4e-06	4.79913e-14	3.41041	0.013437	2.97659	0.0124175	87.2976	0.17786	20.7197	0.0859437
92093-7	MZ707	2.68687	0.0029	0.84951	0.0032	0.0101823	4.4e-05	0.0014701	9.9e-06	0.0002199	6.1e-06	5.94657e-14	3.16071	0.0123851	3.08365	0.0122997	97.5838	0.165429	21.4606	0.0850933
92093-8	MZ707	3.87223	0.0042	1.1559	0.0042	0.0141253	5.5e-05	0.0017694	9.7e-06	0.0011762	8.2e-06	8.0913e-14	3.34771	0.0126944	3.04418	0.0118378	90.9525	0.159747	21.1874	0.0819098
92093-9	MZ707	4.90911	0.0051	1.56555	0.0056	0.018828	7.3e-05	0.0022055	1.3e-05	0.000601	4.7e-06	1.09589e-13	3.13359	0.0116721	3.01905	0.0113198	96.3666	0.147172	21.0135	0.0783332
92093-10	MZ707	4.42246	0.0043	1.43279	0.0051	0.0171488	7e-05	0.0019905	1.3e-05	0.0002864	9e-06	1.00295e-13	3.08452	0.0113816	3.02485	0.0113379	98.0882	0.14923	21.0537	0.0784568
92093-11	MZ707	7.58365	0.0074	2.4597	0.0086	0.029458	0.00011	0.002806	1.1e-05	0.000396	6.4e-06	1.72179e-13	3.08108	0.0111842	3.03289	0.0110543	98.4591	0.139333	21.1094	0.0764923
92093-12	MZ707	4.76852	0.005	1.48079	0.0054	0.0179006	6.9e-05	0.0027723	1.1e-05	0.0010378	5.8e-06	1.03655e-13	3.21808	0.0122108	3.00922	0.0115453	93.5304	0.148177	20.9455	0.0798967
92093-13	MZ707	6.82719	0.0066	2.01818	0.0071	0.0246283	9.2e-05	0.0027322	1.2e-05	0.0024981	1e-05	1.41273e-13	3.38056	0.0123337	3.01122	0.0111893	89.0934	0.136739	20.9594	0.0774324
92093-14	MZ707	6.09798	0.0051	1.90417	0.0064	0.0229769	7.9e-05	0.0024922	1e-05	0.001123	7.4e-06	1.33292e-13	3.20027	0.0110842	3.02425	0.0105797	94.5208	0.120743	21.0495	0.0732104
92093-15	MZ707	3.01131	0.0028	0.87528	0.0032	0.0107581	4.3e-05	0.0019254	1e-05	0.0012578	8.4e-06	6.12696e-14	3.43807	0.0129696	3.00974	0.011816	87.5595	0.149107	20.9491	0.0817697
92093-16	MZ707	5.26248	0.0053	1.683	0.006	0.0202122	7.6e-05	0.0021557	1e-05	0.0005407	6.8e-06	1.1781e-13	3.12473	0.0115758	3.02879	0.0113166	96.9519	0.145576	21.081	0.0783079
92093-17	MZ707	7.51059	0.0074	2.44186	0.0086	0.029159	0.00011	0.0034747	1.1e-05	0.0004005	6.8e-06	1.7093e-13	3.07368	0.0112408	3.02475	0.0111112	98.4309	0.140964	21.053	0.0768878
92093-18	MZ707	1.9804	0.002	0.6064	0.0024	0.0073565	3.4e-05	0.0011635	9.2e-06	0.0003114	7.6e-06	4.2448e-14	3.26362	0.0133306	3.11069	0.0132876	95.3346	0.180629	21.6476	0.0919186
92093-19	MZ707	3.16343	0.0031	0.98423	0.0036	0.01191	4.9e-05	0.0025866	1.1e-05	0.0006863	7.3e-06	6.88961e-14	3.21194	0.0121626	3.00456	0.011649	93.5636	0.150939	20.9133	0.0806157
92093-20	MZ707	2.53802	0.0027	0.80919	0.0031	0.0097778	4.1e-05	0.0013607	9.2e-06	0.0003904	6.4e-06	5.66433e-14	3.13437	0.0124621	2.99059	0.0121687	95.4343	0.165294	20.8166	0.0842171
92093-21	MZ707	4.84661	0.0051	1.5107	0.0055	0.0182888	6.9e-05	0.0024652	1.3e-05	0.0009764	6.2e-06	1.05749e-13	3.20601	0.0121499	3.0133	0.0115478	94.01	0.149478	20.9738	0.079913
92093-22	MZ707	5.36636	0.0055	1.65635	0.0059	0.0200952	7.4e-05	0.0024369	9.8e-06	0.0013189	7.9e-06	1.15945e-13	3.23767	0.0120006	3.00012	0.0112851	92.6833	0.146575	20.8826	0.0780987
92093-23	MZ707	3.83895	0.0038	1.24842	0.0045	0.0149784	5.7e-05	0.0017392	1e-05	0.0002572	9.1e-06	8.73894e-14	3.07296	0.0114867	3.01149	0.0114861	98.0223	0.155726	20.9612	0.0794867
92093-24	MZ707	7.174	0.0066	2.34214	0.008	0.027992	0.0001	0.0039576	1.3e-05	0.0003016	9.4e-06	1.6395e-13	3.06093	0.0108277	3.02266	0.0107733	98.7725	0.135197	21.0385	0.0745504
92093-25	MZ707	4.76762	0.0046	1.40537	0.005	0.0171608	6.4e-05	0.0021858	1.1e-05	0.0017947	8.2e-06	9.83759e-14	3.39012	0.012497	3.0092	0.0113342	88.7822	0.138944	20.9454	0.0784357
92093-26	MZ707	1.50182	0.0014	0.4736	0.0018	0.0057892	2.6e-05	0.0011216	8.9e-06	0.0002968	6.9e-06	3.3152e-14	3.16892	0.012401	2.98246	0.0124997	94.1369	0.187724	20.7603	0.0865104
92093-27	MZ707	3.20957	0.0034	0.99701	0.0037	0.0120564	5e-05	0.0015054	9.2e-06	0.0006715	7.7e-06	6.97907e-14	3.217	0.0124155	3.01613	0.0119303	93.7763	0.162014	20.9933	0.0825592
92093-28	MZ707	2.28356	0.0024	0.72397	0.0028	0.008798	3.5e-05	0.0013242	1.1e-05	0.0003602	7.4e-06	5.06779e-14	3.15207	0.0126329	3.00388	0.0124651	95.3199	0.174567	20.9086	0.086264
92093-29	MZ707	3.67366	0.004	1.19553	0.0043	0.0143698	5.3e-05	0.0017773	9.7e-06	0.0002201	6.8e-06	8.36871e-14	3.07073	0.0115396	3.01586	0.0114821	98.2357	0.162422	20.9915	0.0794573
92093-30	MZ707	1.99429	0.0022	0.62517	0.0023	0.0075941	3.5e-05	0.0012273	9.8e-06	0.0003893	7.1e-06	4.37619e-14	3.18782	0.0122439	3.00237	0.0120821	94.2031	0.1852	20.8981	0.0836141
92093-31	MZ707	4.00052	0.0049	1.26817	0.0048	0.0153749	6.2e-05	0.0018201	1.2e-05	0.0006258	6.4e-06	8.87719e-14	3.15241	0.012541	3.0052	0.0121114	95.3518	0.175939	20.9177	0.0838156
92093-32	MZ707	3.07449	0.0032	0.99377	0.0036	0.0119097	4.8e-05	0.0018321	1e-05	0.0002375	6e-06	6.95639e-14	3.09165	0.0116528	3.02059	0.0115522	97.7238	0.156853	21.0242	0.0799408
92093-33	MZ707	1.86745	0.0022	0.50583	0.002	0.0062074	3e-05	0.0010457	8.9e-06	0.0007701	8.8e-06	3.54081e-14	3.68933	0.015221	3.23545	0.0144788	87.7139	0.210666	22.5104	0.100111
92093-34	MZ707	2.38034	0.0026	0.63406	0.0025	0.0080091	3.7e-05	0.0015075	1.1e-05	0.0016243	9.8e-06	4.43842e-14	3.75156	0.0153489	2.9878	0.0133032	79.6562	0.186103	20.7973	0.0920695
92093-35	MZ707	3.23264	0.0038	0.78456	0.0029	0.0094756	4.2e-05	0.0013401	1e-05	0.0004967	7.5e-06	5.49192e-14	4.11751	0.0159708	3.92882	0.0155761	95.4336	0.176699	27.2982	0.107413
92093-36	MZ707	5.79344	0.0061	1.82176	0.0065	0.0219504	8.3e-05	0.0026525	1.3e-05	0.0006705	7.3e-06	1.27523e-13	3.17796	0.0118223	3.06818	0.0115145	96.5673	0.151217	21.3535	0.0796657
92093-37	MZ707	2.41439	0.0028	0.75404	0.0029	0.0091034	4.2e-05	0.0013173	9.2e-06	0.0004952	8.5e-06	5.27828e-14	3.19975	0.0128534	3.00402	0.0125973	93.9038	0.190761	20.9095	0.087179
92093-38	MZ707	1.66569	0.002	0.53186	0.0021	0.0064065	3e-05	0.0011381	8.1e-06	0.0002656	7.8e-06	3.72302e-14	3.12968	0.012916	2.98112	0.0131132	95.2747	0.217002	20.7511	0.0907567
Sample MZF16, J: 0.0039452 ± 2.14e-6
92089-1	MZF16	4.71057	0.0046	1.67929	0.006	0.0201375	7.6e-05	0.0029238	1.2e-05	0.0001588	7.4e-06	1.1755e-13	2.80324	0.0103832	2.77516	0.0103752	99.0233	0.145324	19.6879	0.0732056
92089-2	MZF16	3.31012	0.0031	1.18064	0.0043	0.0141575	5.6e-05	0.0021688	9.6e-06	0.0001695	6.1e-06	8.26448e-14	2.80181	0.0105364	2.75917	0.010505	98.5028	0.142619	19.5751	0.0741264
92089-3	MZF16	5.30057	0.0049	1.7926	0.0063	0.0216119	8.3e-05	0.002976	1.5e-05	0.0009241	6.5e-06	1.25482e-13	2.95496	0.0107383	2.80125	0.0102789	94.8208	0.132653	19.8719	0.072519
92089-4	MZF16	5.29328	0.0048	1.83354	0.0065	0.0219607	8.2e-05	0.003058	1.8e-05	0.0001872	9.2e-06	1.28348e-13	2.88501	0.0105568	2.85465	0.0105643	98.972	0.137843	20.2487	0.0745168
92089-5	MZF16	2.61058	0.0027	0.85917	0.0033	0.0103446	4.4e-05	0.0019376	9.1e-06	0.0001923	9.1e-06	6.01419e-14	3.03648	0.0120783	2.9701	0.0122523	97.8364	0.178328	21.0628	0.0863846
92089-6	MZF16	4.12311	0.004	1.46007	0.0053	0.0175475	7.2e-05	0.0027071	1.5e-05	0.0002035	7.4e-06	1.02205e-13	2.82204	0.0106034	2.78066	0.0105723	98.5582	0.146484	19.7267	0.0745948
92089-7	MZF16	4.42705	0.0045	1.5646	0.0057	0.0187621	7.4e-05	0.002711	1.2e-05	0.000239	6.1e-06	1.09522e-13	2.82763	0.0106948	2.78219	0.0106046	98.4175	0.148543	19.7375	0.0748226
92089-8	MZF16	4.59638	0.0045	1.59435	0.0057	0.0190827	7.5e-05	0.0028422	1.4e-05	0.0002606	8.5e-06	1.11604e-13	2.88101	0.0106792	2.83239	0.0106364	98.3368	0.1481	20.0917	0.0750319
92089-9	MZF16	3.22167	0.0034	1.0877	0.0041	0.0130571	5.3e-05	0.0024685	1.4e-05	0.0002295	7.4e-06	7.6139e-14	2.95995	0.0115863	2.89741	0.0115447	97.9103	0.162942	20.5502	0.0814189
92089-10	MZF16	6.11328	0.0061	2.16749	0.0077	0.0259379	9.8e-05	0.0036918	1.5e-05	0.0002253	7.5e-06	1.51724e-13	2.81857	0.0104004	2.78768	0.0103515	98.929	0.145172	19.7762	0.0730352
92089-11	MZF16	6.6296	0.0061	2.33529	0.0083	0.02799	0.00011	0.0039139	1.5e-05	0.0005049	8.4e-06	1.6347e-13	2.83699	0.0104155	2.77259	0.0102555	97.7545	0.134229	19.6698	0.0723623
92089-12	MZF16	2.84053	0.0028	1.00286	0.0038	0.0120394	5.1e-05	0.0019974	1e-05	0.0002628	5.2e-06	7.02002e-14	2.83055	0.0110824	2.75264	0.0109126	97.2717	0.148087	19.529	0.0770042
92089-13	MZF16	3.96513	0.0042	1.39958	0.0052	0.0168326	6.8e-05	0.0031131	1.6e-05	0.0002936	5.9e-06	9.79706e-14	2.8312	0.0109382	2.76901	0.010795	97.8275	0.154804	19.6445	0.0761695
92089-14	MZF16	4.4285	0.0044	1.57756	0.0057	0.0189121	7.3e-05	0.0026122	1.2e-05	0.0002799	6.5e-06	1.10429e-13	2.80532	0.0105123	2.75249	0.0104064	98.1415	0.146057	19.5279	0.0734327
92089-15	MZF16	2.31585	0.0028	0.81694	0.0032	0.0098157	4.2e-05	0.0017323	1.1e-05	0.0001785	1e-05	5.71858e-14	2.8329	0.0116132	2.76804	0.0119481	97.7347	0.212714	19.6376	0.0843064
92089-16	MZF16	3.70005	0.0039	1.31348	0.0048	0.0157416	6.4e-05	0.0024111	1.2e-05	0.0002201	6.2e-06	9.19436e-14	2.81511	0.0107069	2.76531	0.0106311	98.2556	0.156117	19.6184	0.0750143
92089-17	MZF16	4.10645	0.0042	1.46123	0.0053	0.0175004	6.5e-05	0.0026759	1.3e-05	0.000194	6.8e-06	1.02286e-13	2.8084	0.0105835	2.76897	0.010543	98.6208	0.152029	19.6442	0.0743913
92089-18	MZF16	4.6947	0.0053	1.63255	0.006	0.0195233	7.5e-05	0.0030566	1.3e-05	0.0001657	7.5e-06	1.14279e-13	2.87377	0.0110488	2.84371	0.0110339	98.9782	0.165952	20.1715	0.0778328
92089-19	MZF16	3.28748	0.0052	1.16224	0.0047	0.013917	6e-05	0.0021314	1.3e-05	0.0002252	9.3e-06	8.13568e-14	2.82669	0.0122742	2.76908	0.012297	97.9864	0.23712	19.645	0.0867681
92089-20	MZF16	3.98392	0.0041	1.41365	0.0052	0.0169616	6.9e-05	0.0026583	1.3e-05	0.0001871	5e-06	9.89555e-14	2.8163	0.0107574	2.77703	0.0106759	98.6304	0.149436	19.7011	0.0753266
92089-21	MZF16	6.94997	0.0071	2.4267	0.0085	0.028994	0.00011	0.0038945	1.7e-05	0.0001802	8.8e-06	1.69869e-13	2.86205	0.0104426	2.83997	0.0104297	99.2533	0.148925	20.1452	0.0735714
92089-22	MZF16	7.18688	0.007	2.41665	0.0084	0.028849	0.00011	0.0038213	1.4e-05	0.0001808	7.3e-06	1.69166e-13	2.97192	0.0107279	2.94966	0.0106965	99.2749	0.140659	20.9188	0.0754215
92089-23	MZF16	3.74837	0.0051	1.32583	0.0053	0.015882	6.6e-05	0.0024083	1.2e-05	0.0001787	6.8e-06	9.28081e-14	2.8253	0.0119304	2.78527	0.0118835	98.608	0.198715	19.7593	0.0838449
92089-24	MZF16	4.11702	0.0041	1.45413	0.0053	0.0173804	6.6e-05	0.0025638	1.1e-05	0.0001919	7.5e-06	1.01789e-13	2.82937	0.0106905	2.79016	0.0106695	98.639	0.150193	19.7937	0.0752777
92089-25	MZF16	4.06542	0.0042	1.44582	0.0053	0.0172972	6.3e-05	0.0024746	1.1e-05	0.0002084	7.2e-06	1.01207e-13	2.80997	0.0107019	2.76708	0.0106599	98.4988	0.154459	19.6309	0.0752172
92089-26	MZF16	2.3378	0.0024	0.82744	0.0031	0.0099405	4.5e-05	0.0016709	1.3e-05	0.0001404	5.1e-06	5.79208e-14	2.82345	0.010968	2.77313	0.0109472	98.2424	0.158075	19.6736	0.0772425
92089-27	MZF16	2.82569	0.0025	1.00131	0.0037	0.0120339	5.4e-05	0.0019398	1.4e-05	0.0001964	5.8e-06	7.00917e-14	2.82011	0.0107153	2.76185	0.0106525	97.9587	0.138296	19.594	0.0751664
92089-28	MZF16	7.11286	0.0071	2.53131	0.0089	0.030218	0.00011	0.0043253	1.6e-05	0.0002819	7.7e-06	1.77192e-13	2.80807	0.0102633	2.77497	0.0101969	98.8462	0.144139	19.6866	0.0719477
92089-29	MZF16	3.45086	0.0033	1.17749	0.0043	0.014247	5.6e-05	0.0022176	8.6e-06	0.0006561	9.1e-06	8.24243e-14	2.92873	0.0110559	2.7627	0.0107265	94.3539	0.153348	19.6	0.0756881
92089-30	MZF16	2.43121	0.0022	0.85846	0.0032	0.0103728	4.6e-05	0.0017631	9e-06	0.0002033	6.4e-06	6.00922e-14	2.83016	0.0108561	2.75984	0.0108377	97.5395	0.148958	19.5798	0.0764736
92089-31	MZF16	6.06583	0.0058	2.15845	0.0076	0.0258092	9.6e-05	0.0036998	1.4e-05	0.0002495	9.7e-06	1.51092e-13	2.80839	0.0102466	2.77404	0.0102233	98.8019	0.142756	19.68	0.0721344
92089-32	MZF16	3.32287	0.0032	1.18048	0.0043	0.0141414	5.5e-05	0.0021238	1e-05	0.0002031	6.6e-06	8.26336e-14	2.81296	0.0105985	2.7618	0.0105563	98.2062	0.147539	19.5937	0.0744877
92089-33	MZF16	3.71297	0.003	1.2737	0.0046	0.0153683	6.3e-05	0.0023789	1.2e-05	0.0002393	7.6e-06	8.9159e-14	2.91315	0.010781	2.85733	0.0107382	98.1077	0.128743	20.2676	0.0757429
92089-34	MZF16	2.2729	0.0025	0.80686	0.0031	0.0096921	4.1e-05	0.0018128	6.3e-06	0.0001941	7.8e-06	5.64802e-14	2.81508	0.0112502	2.74374	0.0113645	97.4901	0.184753	19.4662	0.0801962
92089-35	MZF16	3.80552	0.0039	1.3332	0.0048	0.0159833	6.3e-05	0.0025019	1.3e-05	0.0003143	7.1e-06	9.3324e-14	2.85251	0.010678	2.78239	0.0105608	97.566	0.15374	19.7389	0.0745134
92089-36	MZF16	3.525	0.0035	1.25118	0.0046	0.0149643	6.5e-05	0.0022036	1.5e-05	0.0001843	6.8e-06	8.75826e-14	2.81545	0.0107219	2.77167	0.0106955	98.4698	0.150892	19.6633	0.075467
92089-37	MZF16	3.07367	0.0032	1.08611	0.004	0.013051	5.6e-05	0.0021609	1.3e-05	0.0001845	7.7e-06	7.60277e-14	2.82808	0.0108236	2.77768	0.0108584	98.2426	0.164102	19.7057	0.0766147
92089-38	MZF16	5.35491	0.0062	1.9111	0.007	0.0228618	9.1e-05	0.0032136	1.2e-05	0.0001927	6.2e-06	1.33777e-13	2.80012	0.0107565	2.77016	0.010701	98.9552	0.166622	19.6526	0.0755061
92089-39	MZF16	1.85493	0.0018	0.65836	0.0025	0.0079269	3.8e-05	0.0015066	9.6e-06	0.0001698	6.9e-06	4.60852e-14	2.81561	0.0110353	2.73911	0.0112048	97.3073	0.175227	19.4335	0.0790704
92089-40	MZF16	2.68348	0.0031	0.91019	0.0035	0.0109787	4.6e-05	0.0018054	1.3e-05	0.0004738	6.5e-06	6.37133e-14	2.94628	0.0118297	2.79125	0.0114652	94.7607	0.174908	19.8014	0.0808918
